# Supplementary material for: Revisiting the Unusual: Investigating the Prevalence and Validity of Nonordinary Experiences as a Window into Consciousness
Source: Research Square preprint supplement (doi:10.21203/rs.3.rs-6907742/v1), 2025-06-29
Supplement: Supplementary file 1 [file 4f1a72584039d4166cf8fd60.docx]

**Supplementary File: Revisiting the Unusual: Investigating the Prevalence and Validity of Nonordinary Experiences as a Window into Consciousness**

[**Table S1.** Item wording, backtranslations of the adapted version and Portuguese item wording of the validated INOE items 2](#_Toc200364870)

[**Table S2.** Summary of Validated Experience Items and Process of Validation in Brazil (all versions of each item, validated and non-validated) 15](#_Toc200364871)

[**Exploration of non-validated items** 18](#_Toc200364872)

[**Table S3** Classification of item responses by non-validated item (and its grouping). 21](#_Toc200364873)

[**Table S4.** Study framing 1st analysis: framing x hedging, random effect for participants 23](#_Toc200364874)

[**Table S5.** Study framing effect 2nd analysis: main effect analysis of Mental Health vs non-clinical personality vs INOE , random effect for participants 24](#_Toc200364875)

[**Table S6**. Multilevel ordinal regression analysis with a random effect for participants, comparing the hedging and frequency condition against the binary only response condition. 25](#_Toc200364876)

[**Table S7**. Means, standard deviations, and correlations with confidence intervals comparing the Binary + Hedging and Frequency scale condition against the Binary response condition. 31](#_Toc200364877)

[**Table S8**. Absolute prevalence comparing the Binary + Hedging, Frequency scale and Binary response conditions; Absolute prevalence difference and Rank order for each item. 32](#_Toc200364878)

[**Table S9**. Multilevel logistic regression testing the implied lifetime prevalence for Binary (yes vs no), Low frequency (up to 10 times or more) or High frequency (up to 100 times or more) response options. 34](#_Toc200364879)

[**Table S11**. Means, standard deviations, and correlations with confidence intervals comparing the low frequency and high frequency condition against the binary response condition. 37](#_Toc200364880)

[**Table S12**. Absolute prevalence comparing the low frequency, high frequency and binary conditions; Absolute prevalence difference and Rank order for each item. 38](#_Toc200364881)

[**Figure S13**. Meta-analysis of correlations between validation indicators and lifetime prevalence rates 42](#_Toc200364882)

[**Table S14A**. Multilevel logistic regression assessing the relative influence of validation indicators and methodological conditions on lifetime prevalence responses. PPU, NPU and Unsure responses validation metrics. 44](#_Toc200364883)

[**Table S14B**. Multilevel logistic regression assessing the relative influence of validation indicators and methodological conditions on lifetime prevalence responses. VS and Unsure Responses validation metrics. 45](#_Toc200364884)

[**Table S15.** Prevalence estimates across all studies and conditions for each item. 46](#_Toc200364885)

[**An exploration of the differences in prevalence rates for specific experiences** 49](#_Toc200364886)

# **Table S1.** Item wording, backtranslations of the adapted version and Portuguese item wording of the validated INOE items

| **Nickname** | **Adapted** | **Group** | **Original** | **Revised (back-translated) Version** | **Portuguese translation** | **Original item sources**1 | **Comparable inventories (selected)** |
| --- | --- | --- | --- | --- | --- | --- | --- |
| Absorbed | No | Sense of Self | I have had an experience in which I was completely Absorbed in what I was doing and unaware of the passage of time. | I had an experience where I was completely immersed in what I was doing and didn't notice the passage of time. | Eu tive uma experiência em que estava completamente imerso no que estava fazendo e não percebi a passagem do tempo. | Inspired by CEQ2, DES3 and TAS4,5. | European social survey – absorption item6, Cognitive absorption and beliefs about information technology7. |
| Awe | Yes | Emotion | I have had an experience of awe, wonder, or amazement that stood out from all other such experiences. | I had an experience where I was fascinated and amazed to see, feel, or perceive something grand in a new way that challenged my previous thinking. | Eu tive uma experiência em que fiquei fascinado e maravilhado ao ver, sentir ou perceber algo grandioso de uma forma nova que desafiou como eu pensava até então. | Inspired by secular spiritualities that cultivate awe and wonder. | AWE-S scale8, an item from the mDES scale9,10, DPES (trait of dispositional awe)11, an item from the OAV scale12. |
| Compassion | No | Emotion | I can recall a specific experience in which I felt compassion for the suffering of others (human or nonhuman) that stood out from all other such experiences. | I had a specific experience where I felt compassion for the suffering of others (human or not) that stood out from all other similar experiences I have had. | Eu tive uma experiência específica em que senti compaixão pelo sofrimento de outros (humanos ou não) que se destacou de todas as outras experiências do tipo que eu já tive. | Inspired by different religious traditions. | DPES scale (trait of compassion)11, Compassion Scale13, Evolutionary focused models 14,15. |
| Déjà vu | Yes | Abilities | I can recall one specific experience in which a new situation felt so familiar to me that it seemed as if I had been there before. | I remember a specific experience where I had the sensation of having already lived or seen it before, like a "déjà vu." | Eu me lembro de uma experiência específica em que tive a sensação de já ter vivido ou visto aquilo antes, como um “déjà vu”. | Inspired by AEI16, DES3, PAGE-R17. | The Inventory for Déjà Vu Experiences Assessment16. |
| Devotion (objects) | Yes | Emotion | I have felt devotion or intense attachment toward an irreplaceable object or image. | I have had a strong and deep sense of connection to an image or object that was unique and irreplaceable to me. | Eu já tive um sentimento de ligação forte e profundo com uma imagem ou objeto que era único e insubstituível para mim. | Inspired by sacralization in various religious and secular traditions. | Materialism scale18, an item from the OAV scale12 and adult attachment to transitional objects19. |
| Devotion (people) | No | Emotion | I have felt intense devotion toward a leader or influential person. | I have felt an intense devotion to a leader or influential person. | Eu já senti uma devoção intensa por um líder ou uma pessoa influente. | Inspired by the sacralization of individuals with charismatic appeal (e.g., leaders, shamans, saints, or gurus). | Trust in leadership20, politics as sacralization21 and shamanism22. |
| Diminished Self | No | Sense of Self | I have felt small or insignificant relative to something vast or powerful. | I have felt small or insignificant in relation to something vast or powerful. | Eu já me senti pequeno ou insignificante em relação a algo vasto ou poderoso. | Inspired by scientific literature on awe, MEQ30 23,24. | AWE-S scale8, diminished sense of self25. |
| ESP (minds) | No | Abilities | I have had the experience of thinking of a person I haven’t heard from in ages, and later in the day they contacted me. | I have had the experience of thinking about a person whom I haven't heard from in years, and later on the same day, that person contacted me. | Eu já tive a experiência de pensar em uma pessoa de quem não ouço falar há anos, e mais tarde no mesmo dia a pessoa entrou em contato comigo | Inspired by AEI16, ANNEX26, CEQ2, TAS4,5, PAGE-R17, SAE27,28, and CEQ2 | Belief in Extra-sensory perception29, Porosity theory mind scale30, Belief in supernatural scale31, synchronicity awareness and meaning-detecting scale32. |
|  |  |  |  |  |  |  |  |
|  |  |  |  |  |  |  |  |
| Faces | No | Sensory/Body | I have seen what seemed like a face in a natural or human-made object. | I saw what appeared to be a face in a natural or human-made object. | Eu vi o que parecia ser um rosto em um objeto da natureza ou feito pelo ser humano. | Inspired by reports of people seeing sacred figures in everyday objects or natural formations. | Measures of visual hallucinations33, O-LIFE34, MUSEQ35. |
| Fear | No | Emotion | I have had an experience of Fear or horror that stood out from all other such experiences. | I had an experience of Fear or horror that stood out from all other similar experiences I have had. | Eu tive uma experiência de medo ou horror que se destacou de todas as outras experiências do tipo que eu já tive. | Fears of various sorts in the AEI16 and KS36,37. | The assessment of anxiety states by rating38, GAD-739, mDES scale9,10. |
| Guidance | Yes | Presence | I have had an experience of being guided or influenced by what seemed to be a nonordinary power or being. | I had an experience where it seemed like there was some extraordinary force, energy, or being guiding or influencing my decisions. | Eu tive uma experiência em que parecia que havia alguma força, energia ou ser extraordinário guiando ou influenciando minhas decisões. | Inspired by DSES40. | MPS scale41, feeling of being guided by God42. |
| Hopelessness | No | Emotion | I have had a feeling of Hopelessness that stood out from all other such feelings. | I had an experience where I felt a lack of hope that stood out from all other similar experiences I have had. | Eu tive uma experiência em que senti uma falta de esperança que se destacou de todos as outras experiências do tipo que eu já tive. | Inspired by ANNEX26, O-LIFE34. | Hopelessness scales43,44, PHQ-945. |
| Joy | No | Emotion | I have had an experience of Joy, ecstasy, or bliss that stood out from all other such experiences. | I had an experience of Joy, ecstasy, or complete satisfaction in a way that stood out from all other similar experiences I have had. | Eu tive uma experiência de alegria, êxtase ou satisfação plena de uma forma que se destacou de todas as outras experiências do tipo que eu já tive. | DSES40, MS46, NDES47, MEQ30 23,24 and expanded to include “ecstasy” and “bliss” that overlap and are cultivated in some traditions, e.g. Hinduism. | DPES scale (trait of joy)11, mDES scale9,10, other measures of joy48. |
| Light(s) | No | Sensory/Body | I have seen Light(s) or Light(s)s that appeared to have no ordinary physical source. | I perceived a Light(s) or Light(s)s for which there seemed to be no ordinary explanation. | Eu percebi uma luz ou luzes para as quais parecia não haver uma explicação usual. | Inspired by items that referred to Light(s) or luminosity in the KS34, SAE27,28, and NDES47. | MUSEQ35, OAV scale (elementary imagery trait)12. |
| Loss | No | Emotion | I have had an experience of Loss (of any kind) that stood out from all other such experiences. | I had an experience of losing something or someone that stood out from all other similar experiences I have had. | Eu tive uma experiência de perder algo ou alguém que se destacou de todas as outras experiências do tipo que eu já tive. | Included as a negative emotion. | PCBI49, PGS50. |
| Love | No | Emotion | I have had an experience of Love that stood out from all other such experiences. | I have felt Love in a way that stood out from all other similar experiences I have had. | Eu já senti amor de uma forma que se destacou de todas as outras experiências do tipo que eu já tive. | Inspired by ANNEX26 and DSES40. | DPES scale (trait of joy)11, mDES scale9,10, KAMF 51, OAV scale (Blissful state trait)12. |
| Lucid Dreaming | Yes | Abilities | I have had the experience of being aware that I was dreaming while asleep. | During a dream, I have had an experience where I knew I was dreaming, even though I hadn't woken up yet. | Durante um sonho, eu já tive uma experiência em que sabia que eu estava sonhando, apesar de ainda não ter acordado. | Inspired by AEI16, traditions that cultivate this ability as a portal into “other worlds.”. | Physiological correlates of lucid dreaming52, LuCiD53, ISES54,55. |
| Misfortune | No | Emotion | I have had an experience of Misfortune that stood out from all other such experiences. | I had an experience of Misfortune or tragedy that stood out from all other similar experiences I have had. | Eu tive uma experiência de desgraça ou tragédia que se destacou de todas as outras experiências do tipo que eu já tive. | Inspired by literature on witchcraft beliefs, included as a negative emotion. | The impact of Event Scale56, responses to misfortune57. |
| Near Death | No | Sickness/Health | I have had an experience in which I felt as if I was about to die. | I have had an experience where I was close to death. | Eu já tive uma experiência em que estive prestes a morrer. | Inspired by literature on spiritual appraisals. | NDES47, NDE-C scale58, The NDE OBE Research Project59. |
| Out of body experience (OBE) | Yes | Sense of Self | I have had an experience in which it seemed as if I left my physical body | I went through a situation where I was outside of my physical body and could perceive it as separate from myself. | Passei por uma situação em que eu estava fora do meu corpo físico e pude percebê-lo separado de mim | Inspired by the AEI16, CEQ2, KS34, TAS4,5, PAGE-R17, SAE27,28, and NDES47. | The NDE OBE Research Project59, Belief in supernatural scale31, CDS60, OAV scale (Disembodiment trait)12. |
| Pain | No | Sensory/Body | I have had an experience of physical Pain that stood out from all other such experiences. | I had an experience of Pain that stood out from all other similar experiences I have had. | Eu tive uma experiência de dor que se destacou de todas as outras experiências do tipo que eu já tive. | A strongly unpleasant or agonizing physical sensation (Adapted from OED, 3a). | Pains scale in adults61. |
| Paralysis | No | Sensory/Body | I have been unable to move or communicate because my body, my limbs, or my voice was paralyzed. | I was unable to move or communicate because my body, limbs, or voice were paralyzed. | Não consegui me mover ou me comunicar porque meu corpo, meus membros ou minha voz estavam paralisados. | Inspired by PAGE-R17. | WUSEQ, USEQ, SPQ and other sleep paralysis questionnaires62,63, MID-6064, OAV (Impaired Control and cognition trait) 10. |
| Past Life | Yes | Abilities | I have distinct memories that made it seem as if I had lived a past life in a different body. | I have specific memories that make me believe I may have lived a previous life, in a different body than my own. | Eu tenho memórias específicas que me fazem crer que eu posso já ter vivido uma vida anterior, em outro corpo diferente do meu. | Inspired AEI16 and SAE27,28. | Belief in supernatural scale31. |
| Places (special) | Yes | Emotion | I have felt a sense of deep attachment or connection to a specific place that stood out from all other such places. | I had a deep feeling of attachment and strong connection to a specific place that I have never felt in any other location. | Eu tive um sentimento profundo de apego e forte conexão com um determinado lugar que eu jamais senti em qualquer outro local. | Inspired by the emphasis on sacred sites in indigenous traditions and on holy places in many religions. | The role of religion in place attachment65, Place attachment measures66. |
| Presence (nonordinary) | Yes | Presence | I have sensed the presence of what seemed to be nonordinary forces or beings. | I have felt that extraordinary beings or forces were around me (for example, in places I've been, in objects or images, or through my own intuition or sensation). | Eu já senti que seres ou forças extraordinárias estavam ao meu redor (por exemplo, em lugares onde estive, em objetos ou imagens ou a partir da minha própria intuição ou sensação). | Inspired by AEI16, DSES40) O-LIFE34, PAGE-R17, NDES47. | MUSEQ35. |
| Sounds (voices) | No | Sensory/Body | I have heard a voice when it did not seem like anyone was really there. | I have heard a voice when no one seemed to be around. | Eu já ouvi uma voz quando ninguém parecia estar por perto. | Inspired by ANNEX26, DES3, KS34, and PAGE-R17. | MUSEQ35, MID-6064, LSHS-R67. |
| Touch | No | Sensory/Body | I have felt a physical Touch when it did not seem like anyone was really there. | I have felt a physical Touch when no one seemed to be around. | Eu já senti um toque físico quando ninguém parecia estar por perto. | Inspired by PAGE-R17 and SAE27,28. | MUSEQ35, LSHS-R67. |
| Peace | Not validated | Emotion | I have had an experience of peace or wholeness that *stood out from all other such experiences*. | I have felt an inner peace or sense of fullness that was independent of my current stress level. As if, even in the midst of chaos, my mind remained calm and unchanged because of that peace. | Eu já senti uma paz interior ou plenitude que independeu da minha sensação de estresse no momento. Como se mesmo diante do caos, minha mente permanecesse tranquila, inalterada, por conta dessa paz. | Inspired by ANNEX26, DSES40, MS46, NDES47, MEQ30 23,24. | Metapersonal Self41, OAV (/Blissful trait) 10. |
| Pleasure | No | Emotion | I have had an experience of Pleasure that stood out from all other such experiences. | I had a pleasurable experience that stood out from all other such experiences. | Eu tive uma experiência prazerosa que se destacou de todas as outras experiências do tipo que já eu tive. | Inspired by the Hindu concept of *lila,* which has no direct equivalent in English but is sometimes translated as “play.” | TEPS68, MAP-SR69, OAV (/Blissful trait) 10. |
| Automaticity | Yes |  | I have had an experience in which it seemed like my body was performing actions outside my control (such as moving, speaking, or writing). | I went through a situation in which my body acted independently, without my conscious control, as if it was moving, speaking, or writing on its own. | Eu passei por uma situação em que meu corpo agiu de forma independente, sem meu controle consciente, como se estivesse se movendo, falando ou escrevendo por conta própria. | Inspired by AEI16, CEQ2, ANNEX26, O-LIFE34, PAGE-R17, DES3, O-LIFE34. | CDS60, OAV (Impaired Control and cognition trait) 10. |
| Places (animated) | No |  | I have experienced a particular place that seemed to contain a non-ordinary presence or power. | I have been in a specific place that seemed to contain a presence, force, or extraordinary power. | Eu estive em um lugar específico que parecia conter uma presença, força ou poder extraordinário. | Inspired by indigenous traditions.. | Belief in supernatural scale31. |
| Objects (animated) | No |  | I have seen and/or interacted with images, statues, or other physical objects that seemed to contain a non-ordinary power or being. | I had an experience in which an image, statue, or object seemed to have some special power, as if a force or higher being was contained within it. | Eu já tive uma experiência em que uma imagem, estátua ou objeto parecia ter algum poder especial, como se uma força ou ser superior estivesse contido ali. | Inspired by traditions, such as Hinduism, Catholicism, and Eastern Orthodoxy. | Belief in supernatural scale31. |
| Meaning in life | No |  | I have had an experience in which the meaning and purpose of my life suddenly seemed clear. | I had an experience where, suddenly, the meaning and purpose of my life became clear. | Eu tive uma experiência em que, de um momento para o outro, o sentido e o propósito da minha vida se tornaram claros. | Inspired by ANNEX26. | MLQ70. |
| ESP (events) | Yes |  | I have had an impression that a specific event was occurring at some distant location that later turned out to be true. | I once had an intuition that something specific was happening in a distant place, without me having any clues about it, and then that intuition turned out to be true. | Eu já tive uma intuição de que algo específico estava acontecendo em um lugar distante, sem que eu tivesse pistas sobre isso, e depois essa intuição se confirmou verdadeira. | Inspired by AEI16, PAGE-R17, SAE27,28, NDES47, SAE27,28. | Belief in supernatural scale31. |
| Messages | Not validated |  | I have experienced or felt things in the world around me that seemed to contain Messages or hints. | I once had an experience where I noticed things around me that seemed to have meanings or messages directed at me, as if it were a "sign". | Eu já vivi uma experiência, em que percebi coisas ao meu redor que pareciam ter significados ou mensagens direcionadas a mim, como se fosse um"sinal". | Adapted from ANNEX26. | The referential thinking scale manual71, synchronicity awareness and meaning-detecting scale32. |
| Deep insight | Not validated |  | I have had a sudden, deep insight in which the nature of reality, the functioning of society, or other fundamental issues seemed clear. | I have had an experience where I suddenly had clarity of mind and was able to understand profound questions about society or the world. | Eu já tive uma experiência, na qual, de repente, eu tive uma clareza mental e consegui compreender questões profundas sobre a sociedade ou sobre o mundo. | Inspired by ANNEX26, MS46, and MEQ30. | PIS-672, OAV (Insightfulness trait) 10. |
| Healing | Not validated |  | I have experienced a sudden and unexpected recovery from an illness (physical, mental, or any other kind). | I have had an experience where I suddenly and unexpectedly recovered from an illness (physical, mental or otherwise). | Eu já tive uma experiência em que, de repente, me recuperei de forma inesperada de uma doença (física, mental ou de qualquer outro tipo) | Inspired by AEI16, SAE27,28. |  |
| Coincidences | Not validated |  | I have experienced a coincidence that seemed meaningful | I have experienced a series of coincidences that did not seem to have occurred by chance, as if there was a greater meaning or sense behind these situations. | Eu já vivenciei uma série de coincidências que não pareciam ter ocorrido somente ao acaso, como se houvesse um significado ou sentido maior por trás dessas situações. | Inspired by ANNEX26, O-LIFE34, PAGE-R17, SAE27,28. | Synchronicity awareness and meaning-detecting scale32. |

*Note*: Original and revised versions of INOE items are presented with their corresponding nicknames, conceptual groups, and validated Portuguese translations. The column “Adapted” indicates revision status based on participant comprehension ("Yes" for revised wording, "No" if original wording was retained, “Not Validated” if the revised wording was not validated). Clinical instruments and theoretical frameworks as well as relevant nonclinical instruments and literature sources that inspired or contextualized specific items are listed.

# **Table S2.** Summary of Validated Experience Items and Process of Validation in Brazil (all versions of each item, validated and non-validated)

| **Nickname** | **Group** | **Iteration** | **N †** | **ExpU** | **ExpNU** | **3s** | **VS** | **PPU** | **NPU** |
| --- | --- | --- | --- | --- | --- | --- | --- | --- | --- |
| Absorbed | Sense of self | 1 | 37 | 25 | 4 | 1 | 85.3 | 86.2 | 75.0 |
| Automaticity | Sense of self | 1 | 50 | 5 | 7 | 6 | 41.9 | 41.7 | 46.7 |
| Automaticity | Sense of self | 2 | 25 | 2 | 6 | 5 | 56.2 | 25.0 | 87.5 |
| Automaticity | Sense of self | 3 | 36 | 6 | 5 | 0 | 57.6 | 54.5 | 68.4 |
| Automaticity | Sense of self | 4 | 11 | 1 | 1 | 1 | 55.6 | 50.0 | 66.7 |
| Awe | Emotion | 1 | 40 | 18 | 5 | 3 | 74.2 | 78.3 | 60.0 |
| Awe | Emotion | 2 | 41 | 14 | 0 | 4 | 92.0 | 100.0 | 100.0 |
| Coincidences | Meaning | 1 | 25 | 5 | 6 | 3 | 47.4 | 45.5 | 40.0 |
| Coincidences | Meaning | 2 | 16 | 7 | 1 | 2 | 75.0 | 87.5 | 50.0 |
| Compassion | Emotion | 1 | 53 | 34 | 1 | 1 | 98.0 | 97.1 | 100.0 |
| Deep insight | Meaning | 1 | 21 | 4 | 2 | 2 | 38.5 | 66.7 | 33.3 |
| Deep insight | Meaning | 2 | 11 | 2 | 5 | 1 | 40.0 | 28.6 | 100.0 |
| Deep insight | Meaning | 3 | 11 | 0 | 6 | 1 | 14.3 | 0.0 | 100.0 |
| Devotion (objects) | Emotion | 1 | 21 | 3 | 0 | 2 | 78.6 | 100.0 | 80.0 |
| Devotion (objects) | Emotion | 2 | 28 | 11 | 3 | 1 | 84.0 | 78.6 | 85.7 |
| Devotion (people) | Emotion | 1 | 22 | 3 | 1 | 1 | 94.4 | 75.0 | 100.0 |
| Diminished Self | Sense of self | 1 | 59 | 31 | 3 | 9 | 89.4 | 91.2 | 85.7 |
| Déjà vu | Abilities | 1 | 25 | 7 | 9 | 1 | 47.8 | 43.8 | 50.0 |
| Déjà vu | Abilities | 2 | 27 | 16 | 3 | 3 | 82.6 | 84.2 | 66.7 |
| ESP (events) | Abilities | 1 | 23 | 2 | 5 | 2 | 57.1 | 28.6 | 85.7 |
| ESP (events) | Abilities | 2 | 56 | 10 | 0 | 8 | 64.5 | 100.0 | 55.6 |
| ESP (events) | Abilities | 3 | 16 | 6 | 1 | 0 | 71.4 | 85.7 | 80.0 |
| ESP (events) | Abilities | 4 | 11 | 4 | 0 | 0 | 77.8 | 100.0 | 100.0 |
| ESP (events) | Abilities | 5 | 11 | 1 | 2 | 0 | 55.6 | 33.3 | 66.7 |
| ESP (minds) | Abilities | 1 | 21 | 9 | 0 | 3 | 94.1 | 100.0 | 83.3 |
| Faces | Sensory/Body | 1 | 25 | 11 | 1 | 3 | 80.0 | 91.7 | 66.7 |
| Fear | Emotion | 1 | 62 | 29 | 0 | 4 | 100.0 | 100.0 | 100.0 |
| Guidance | Presence | 1 | 24 | 4 | 4 | 3 | 37.5 | 50.0 | 28.6 |
| Guidance | Presence | 2 | 22 | 7 | 1 | 3 | 93.3 | 87.5 | 100.0 |
| Healing | Sickness/ Health | 1 | 20 | 3 | 5 | 1 | 62.5 | 37.5 | 87.5 |
| Healing | Sickness/ Health | 2 | 51 | 9 | 6 | 4 | 77.8 | 60.0 | 91.7 |
| Hopelessness | Emotion | 1 | 23 | 16 | 0 | 0 | 95.2 | 100.0 | 80.0 |
| Joy | Emotion | 1 | 49 | 33 | 1 | 3 | 95.0 | 97.1 | 100.0 |
| Light(s) | Sensory/Body | 1 | 22 | 7 | 0 | 0 | 94.1 | 100.0 | 88.9 |
| Loss | Emotion | 1 | 52 | 32 | 1 | 1 | 98.0 | 97.0 | 100.0 |
| Love | Emotion | 1 | 53 | 33 | 0 | 5 | 90.7 | 100.0 | 60.0 |
| Lucid Dreaming | Abilities | 1 | 23 | 5 | 4 | 5 | 60.0 | 55.6 | 75.0 |
| Lucid Dreaming | Abilities | 2 | 22 | 16 | 1 | 4 | 94.1 | 94.1 |  |
| Meaning in life | Meaning | 1 | 54 | 14 | 3 | 1 | 80.5 | 82.4 | 71.4 |
| Meaning in life | Meaning | 2 | 26 | 5 | 3 | 7 | 60.0 | 62.5 | 100.0 |
| Meaning in life | Meaning | 3 | 36 | 9 | 7 | 3 | 65.5 | 56.2 | 88.9 |
| Messages | Meaning | 1 | 21 | 2 | 4 | 4 | 35.7 | 33.3 | 50.0 |
| Messages | Meaning | 2 | 13 | 1 | 1 | 0 | 14.3 | 50.0 | 0.0 |
| Messages | Meaning | 3 | 14 | 2 | 2 | 0 | 44.4 | 50.0 | 25.0 |
| Messages | Meaning | 4 | 11 | 3 | 3 | 2 | 44.4 | 50.0 | 50.0 |
| Messages | Meaning | 5 | 10 | 0 | 4 | 3 | 42.9 | 0.0 | 100.0 |
| Misfortune | Emotion | 1 | 24 | 9 | 0 | 0 | 100.0 | 100.0 | 100.0 |
| Near Death | Sickness/ Health | 1 | 22 | 8 | 0 | 0 | 93.8 | 100.0 | 100.0 |
| OBE | Sense of self | 1 | 46 | 6 | 7 | 6 | 56.0 | 46.2 | 66.7 |
| OBE | Sense of self | 2 | 27 | 7 | 1 | 5 | 76.5 | 87.5 | 71.4 |
| OBE | Sense of self | 3 | 27 | 4 | 0 | 1 | 88.2 | 100.0 | 83.3 |
| Objects (animated) | Presence | 1 | 39 | 2 | 2 | 3 | 73.3 | 50.0 | 83.3 |
| Objects (animated) | Presence | 2 | 37 | 9 | 1 | 1 | 86.2 | 90.0 | 82.4 |
| Pain | Sensory/Body | 1 | 47 | 39 | 1 | 2 | 97.7 | 97.5 | 100.0 |
| Paralysis | Sensory/Body | 1 | 35 | 9 | 0 | 2 | 95.7 | 100.0 | 92.9 |
| Past Life | Abilities | 1 | 21 | 6 | 0 | 0 | 75.0 | 100.0 | 69.2 |
| Past Life | Abilities | 2 | 27 | 5 | 0 | 2 | 94.7 | 100.0 | 92.9 |
| Peace | Emotion | 1 | 61 | 23 | 5 | 8 | 74.4 | 82.1 | 100.0 |
| Peace | Emotion | 2 | 43 | 16 | 1 | 8 | 66.7 | 94.1 | 22.2 |
| Peace | Emotion | 3 | 17 | 9 | 0 | 0 | 76.9 | 100.0 | 0.0 |
| Places (animated) | Presence | 1 | 21 | 8 | 1 | 3 | 88.2 | 88.9 | 83.3 |
| Places (special) | Emotion | 1 | 24 | 15 | 4 | 2 | 80.0 | 78.9 | 100.0 |
| Places (special) | Emotion | 2 | 28 | 10 | 0 | 8 | 89.5 | 100.0 | 33.3 |
| Pleasure | Emotion | 1 | 48 | 34 | 1 | 4 | 90.7 | 97.1 | 33.3 |
| Presence (non ordinary) | Presence | 1 | 53 | 21 | 3 | 1 | 81.4 | 87.5 | 75.0 |
| Presence (non ordinary) | Presence | 2 | 24 | 12 | 2 | 2 | 88.9 | 85.7 | 100.0 |
| Sounds (voices) | Sensory/Body | 1 | 28 | 13 | 0 | 4 | 95.7 | 100.0 | 87.5 |
| Touch | Sensory/Body | 1 | 23 | 10 | 1 | 0 | 88.2 | 90.9 | 100.0 |

*Note*: ExpU = number of participants who reported having experienced the specific phenomenon and demonstrated a correct understanding of the corresponding item; ExpNU = number of participants who reported having experienced the specific phenomenon but demonstrated a lack of understanding of the corresponding item; 3s = number of participants who reported experiencing the phenomenon but whose responses were rated as ambiguous ("3") by coders; VS = Validation Score; PPU = positive proportion understood; NPU = negative proportion understood; **†** The total N contains all valid responses per item, value is larger than the sum of the Expu, Expnu and 3 columns due to the number of individuals not reporting having had the experience; Non-validated versions are those with a VS below 80%.

# **Exploration of non-validated items**

We examined the items responses that were coded as not understood for those items that did not pass the 80% VS threshold. We applied thematic analysis73 to identify common themes in the responses. The responses were read repeatedly by the four coders that had classified all the responses and emergent themes were examined against their prevalence in the corpus and the ability to represent the material. We attempted to identify themes that had at least 5 responses across all items. This was achieved for all themes except for one (intuitions). We decided to keep this theme because it reflects an item that was considered as a potential nonordinary experience in the original inventory, but was not validated1. The emergence of a themes in responses that are classified as not understood for other items may present new insights into the understanding of such an experience. The final themes were discussed and agreed upon with all co-authors.

The main themes that were identified are listed in Table S3. A few points are noteworthy. The overall theme that was most common for responses to these non-understood items was labelled déjà vu because people either explicitly used the term or implied the technical interpretation of déjà vu. The emergent theme is therefore similar to the validated item in the inventory. Overall, the term is widely used in the population, often incorporated in contexts such as novels or soap operas, but without a clear explanation of what exactly it represents. Our data implies that the term and concept of déjà vu in Brazil is relative poorly elaborated at a cognitive level and more broadly applied to various phenomena that are common but indicate some source confusion or memory failure. This broad usage of the term may also need attention when considering responses to the validated déjà vu item in future studies, as these experiences may be very common, but also relatively vaguely understood. As reported in the main text, the NPU score was below 80% implying that some individuals may have had the experience but were unable to report on it.

Nonordinary infused themes that mirror INOE items such as a) coincidences b) déjà vu, c) intuitions, d) out of body experiences, e) paralysis, f) premonitions, g) presence or h) hearing voices were particularly salient for the experience items of automaticity, coincidences, messages as well as ESP (events). Of note is that some themes emerged that closely resemble nonvalidated items such as coincidences, suggesting that individuals may describe experiences indicating a coincidence of unrelated events occurring, but do this in relation to other irrelevant items. As noted already, there are also emergent themes such as déjà vu, paralysis, presence or out of body experiences that are captured in validated experience items, but reports indicating these experiences are also related in response to other items. This raises some questions on the distinctiveness of some of these experiences and how individuals in this community recognize and categorize specific experiences.

In contrast, more medical or scientific themes emerged when examining the classification of responses to automaticity and healing. In these cases, there was a clear medical reason attributed for both the automaticity and healing interpretation. Because the experience is supposed to be nonordinary (not easily explained by medical explanations such as taking medicine or undergoing an operation), the responses were classified as not understood.

Focusing on specific items, and starting with the items within the Meaning group that we had particular problems validing, experiences related to the item coincidences were often responded to using the term déjà vu, which seems to represent a sense of perplexity, involving moments of coincidence and repetition of experiences that seem not to have been experienced previously (e.g. "Places I’ve never been and were already familiar to me"). More generally, these responses often invoked some supernatural characteristics, which fits with the strong role of religion and spirituality in Brazilian culture.

The deep insight experience item was often interpreted in terms of logical reasoning and progressive understanding, lacking the spontaneous experience of a ‘click’ (e.g. "I have been studying philosophy at UFBA and several things that seemed to be extremely simple after being untapped become very complex.") The responses often invoked a justification or expected logic grounded in events or experiences. A further observation is that some of the responses lacked the broader or deeper meaning part (e.g., focusing on specific fragments or questions and not having the quality of a deeper revelation as implied by the original item).

The last experience item within the meaning group that we were unable to validate was Messages (“experienced or felt things in the world around me that seemed to contain messages or hints”). Our participants seemed to interpret the items in a broader spiritual or sensed presence sense (e.g.,. "Whenever I am alone, especially at night, I have the feeling that there is something around me watching me", "I heard voices directed to me, but no one else heard"), which may not convey Messages directly to the individual. A good number of individuals also interpreted the item as a form of intuition or an "inner message", dissociated from visible manifestations in the external environment. In some cases, these responses took the form of ESP like events (e.g. "I dreamed that something would happen and then something of the dream happened").

In contrast, the ESP (Events: “had an impression that a specific event was occurring at some distant location that later turned out to be true”) item showed a tendency to be interpreted in terms of premonitions and intuitions that occur later, rather than simultaneously (e.g., "At a wedding I saw that the bride cried a lot. Then it hurts, after months of marriage she lost her husband in a car accident"). A central issue that we encountered in responses was the lack of temporal distinction. Again, a number of individuals invoked déjà vu (e.g., "I have already had the feeling of having been in a place that has just arrived").

The Inner Peace experience item was the only emotion term that we were unable to validate. It was often responded to in terms that implied moments of relief, often explicitly referring to overcoming challenges, achieving goals and absence of stress. We were unable to identify a version that emphasizes the inner qualities of peace even in the presence of external stress. It appears to be a marked characteristic of the busy social and work life of Brazilians which makes this distinction between inner and deep peace from absence of fatigue or stress quite challenging.

The Automaticity item (“an experience in which it seemed like my body was performing actions outside my control (such as moving, speaking, or writing)) responses fell into various themes. A first point is again the confusion with other experience items such as out-of-body experiences, which in some way may imply some automaticity component. A second relative common theme was being on autopilot due to stress or fatigue as well as acting on impulse or the inability to control one’s emotions (e.g., emotional outbursts as a form of automatic reaction) were common responses. It is worth noting that these experiences may be relative common in our population (due to many individuals working two or more jobs to make ends meet and facing long commutes). Such experiences may stand out as being a notable feature of day-to-day life, but they do not necessarily imply the nonordinary characteristics desired in the original instrument. A final theme that was worth noting was the mentioning of Paralysis as the opposite of what is proposed by the item (e.g. “I was going down to the garage and it was as if my legs were being held. I ended up falling”).

Responses to the Healing item suggested that people have difficulty understanding the concept of an instantaneous, sudden recovery. Our team was somewhat surprised by the problems validating these items given the widespread engagement of the general population with spiritual healers that promise speedy recovery for all sorts of ills. However, it seems that even those recoveries may not be sudden and require substantive spiritual or religious labor. A second important point was the recognition of medical or biological sources of recovery, which again was not intended by the original item.

Overall, our analysis suggests that there are certain normative social practices and constraints that have an influence on the interpretation of these items. By focusing on these responses, it becomes possible to discern some features of the larger social and cultural context that can be used for further exploration and elaboration of items. It also provides insights into the cognitive processes within our population and the social conditions that shape these cognitions and interpretations.

# **Table S3** Classification of item responses by non-validated item (and its grouping).

|  | Emotion | Sense of self | Meaning | Meaning | Meaning | Sickness | Abilities |
| --- | --- | --- | --- | --- | --- | --- | --- |
| Response Classification  from Thematic Analysis | Peace | Automaticity | Coincidences | Deep Insights | Messages | Healing | ESP (events) |
| Coincidences | 0 | 0 | 0 | 2 | 0 | 0 | 3 |
| Déjà-vu | 0 | 0 | 9 | 0 | 2 | 0 | 8 |
| Intuitions | 0 | 0 | 0 | 1 | 1 | 0 | 1 |
| Out of body experiences | 0 | 10 | 0 | 0 | 0 | 0 | 0 |
| Paralysis | 0 | 9 | 0 | 0 | 0 | 0 | 0 |
| Premonition | 0 | 0 | 0 | 0 | 7 | 0 | 5 |
| Presence | 0 | 0 | 2 | 0 | 5 | 0 | 0 |
| Hearing voices | 0 | 0 | 0 | 0 | 5 | 0 | 0 |
| Autopilot | 0 | 8 | 0 | 0 | 0 | 0 | 0 |
| Lack of stress | 11 | 0 | 0 | 0 | 0 | 0 | 0 |
| Life goals | 6 | 0 | 0 | 0 | 0 | 0 | 0 |
| Reasoning | 0 | 0 | 2 | 4 | 4 | 0 | 1 |
| Physiological/medical conditions | 0 | 6 | 0 | 0 | 0 | 3 | 0 |
| Gradual health improvement | 0 | 0 | 0 | 0 | 0 | 7 | 0 |
| Bodily/sensory experiences | 0 | 5 | 0 | 0 | 0 | 0 | 0 |
| Other responses not further classifiable | 2 | 5 | 0 | 7 | 5 | 3 | 8 |

*Note*: The table shows the presence of different response classifications of participant responses emerging from the thematic analysis of the item response for each of the unvalidated items (first column). The items are listed in the columns 2 to 7, together with the overall item grouping from the original inventory.

# **Table S4.** Study framing 1st analysis: framing x hedging, random effect for participants

|  | **Lifetime prevalence** | | | | |
| --- | --- | --- | --- | --- | --- |
| *Predictors* | *Odds Ratios* | *std. Error* | *CI* | *Statistic* | *p* |
| (Intercept) | 0.945 | 0.056 | 0.842 – 1.062 | -0.951 | 0.342 |
| Conditions [Mental Health first] | 0.679 | 0.056 | 0.578 – 0.797 | -4.716 | **<0.001** |
| Binary without hedging | 1.015 | 0.084 | 0.862 – 1.194 | 0.173 | 0.862 |
| Conditions [Mental Health first × Binary without hedging] | 1.085 | 0.127 | 0.863 – 1.363 | 0.696 | 0.486 |
| **Random Effects** | | | | | |
| σ2 | 3.29 | | | | |
| τ00 participant | 1.26 | | | | |
| ICC | 0.28 | | | | |
| N participant | 1652 | | | | |
| Observations | 51274 | | | | |
| Marginal R2 / Conditional R2 | 0.007 / 0.281 | | | | |

*Note*: Multilevel logistic regression examining effects of survey framing (Conditions: "Mental Health screening first" vs the reference "INOE items screening first") and response hedging ("Binary without hedging" vs the reference "Binary with hedging") on lifetime prevalence ("yes") responses. Odds Ratios (OR), standard errors (SE), 95% confidence intervals (CI), z-statistics, and corresponding p-values are reported. Random intercepts for participants are included. Marginal R² represents variance explained by fixed effects alone; conditional R² represents total variance explained by both fixed and random effects.

# **Table S5.** Study framing effect 2nd analysis: main effect analysis of Mental Health vs non-clinical personality vs INOE , random effect for participants

|  | **Lifetime prevalence** | | | | |
| --- | --- | --- | --- | --- | --- |
| *Predictors* | *Odds Ratios* | *std. Error* | *CI* | *Statistic* | *p* |
| (Intercept) | 0.958 | 0.058 | 0.850 – 1.079 | -0.707 | 0.480 |
| Condition [Mental Health first] | 0.738 | 0.064 | 0.622 – 0.876 | -3.480 | **0.001** |
| Condition [Non-clinical personality first] | 0.895 | 0.077 | 0.757 – 1.059 | -1.293 | 0.196 |
| **Random Effects** | | | | | |
| σ2 | 3.29 | | | | |
| τ00 participant | 1.37 | | | | |
| ICC | 0.29 | | | | |
| N participant | 1242 | | | | |
| Observations | 38533 | | | | |
| Marginal R2 / Conditional R2 | 0.003 / 0.297 | | | | |

*Note*: Multilevel logistic regression examining the main effects of survey framing conditions (“Mental Health screening first” and “Non-clinical personality screening first”) compared to the reference category (“INOE items screening first”) on lifetime prevalence (“yes”) responses. Odds Ratios (OR), standard errors (SE), 95% confidence intervals (CI), z-statistics, and corresponding p-values are reported. Random intercepts for participants are included. Marginal R² represents variance explained by fixed effects alone; conditional R² represents total variance explained by both fixed and random effects.

# **Table S6**. Multilevel ordinal regression analysis with a random effect for participants, comparing the hedging and frequency condition against the binary only response condition.

|  | **Lifetime prevalence** | | | | |  |
| --- | --- | --- | --- | --- | --- | --- |
| *Predictors* | *Odds Ratios* | *std. Error* | *CI* | *Statistic* | *p* | *p(bonferroni)* |
| (Intercept) | 5.967 | 0.339 | 5.338 – 6.670 | 31.434 | **<0.001** | **<0.001** |
| Binary + hedging | 1.239 | 0.107 | 1.045 – 1.468 | 2.472 | **0.013** | 1.000 |
| Frequency | 4.680 | 0.446 | 3.883 – 5.641 | 16.201 | **<0.001** | **<0.001** |
| Item [Absorbed] | 0.573 | 0.042 | 0.496 – 0.662 | -7.540 | **<0.001** | **<0.001** |
| Item [Awe] | 0.289 | 0.020 | 0.252 – 0.332 | -17.689 | **<0.001** | **<0.001** |
| Item [Déjà vu] | 0.829 | 0.063 | 0.714 – 0.963 | -2.459 | **0.014** | 1.000 |
| Item [Devotion (objects)] | 0.047 | 0.004 | 0.041 – 0.054 | -41.022 | **<0.001** | **<0.001** |
| Item [Devotion (people)] | 0.032 | 0.002 | 0.028 – 0.037 | -44.526 | **<0.001** | **<0.001** |
| Item [Diminished Self] | 0.457 | 0.033 | 0.396 – 0.526 | -10.842 | **<0.001** | **<0.001** |
| Item [ESP (minds)] | 0.142 | 0.010 | 0.123 – 0.163 | -27.798 | **<0.001** | **<0.001** |
| Item [Faces] | 0.119 | 0.008 | 0.103 – 0.136 | -30.455 | **<0.001** | **<0.001** |
| Item [Fear] | 0.199 | 0.014 | 0.174 – 0.229 | -22.984 | **<0.001** | **<0.001** |
| Item [Guidance] | 0.110 | 0.008 | 0.096 – 0.127 | -31.130 | **<0.001** | **<0.001** |
| Item [Hopelessness] | 0.263 | 0.019 | 0.229 – 0.301 | -18.957 | **<0.001** | **<0.001** |
| Item [Joy] | 0.428 | 0.031 | 0.371 – 0.492 | -11.820 | **<0.001** | **<0.001** |
| Item [Light(s)] | 0.041 | 0.003 | 0.036 – 0.048 | -42.171 | **<0.001** | **<0.001** |
| Item [Loss] | 0.304 | 0.021 | 0.265 – 0.349 | -16.844 | **<0.001** | **<0.001** |
| Item [Love] | 0.885 | 0.069 | 0.760 – 1.031 | -1.572 | 0.116 | 1.000 |
| Item [Lucid Dreaming] | 0.747 | 0.057 | 0.644 – 0.867 | -3.845 | **<0.001** | **0.011** |
| Item [Meaning in life] | 0.123 | 0.009 | 0.107 – 0.141 | -29.635 | **<0.001** | **<0.001** |
| Item [Misfortune] | 0.092 | 0.007 | 0.080 – 0.106 | -33.590 | **<0.001** | **<0.001** |
| Item [Near Death] | 0.100 | 0.007 | 0.087 – 0.115 | -32.380 | **<0.001** | **<0.001** |
| Item [OBE] | 0.034 | 0.003 | 0.029 – 0.039 | -43.674 | **<0.001** | **<0.001** |
| Item [Objects (animated)] | 0.025 | 0.002 | 0.022 – 0.030 | -45.583 | **<0.001** | **<0.001** |
| Item [Pain] | 0.373 | 0.027 | 0.324 – 0.429 | -13.744 | **<0.001** | **<0.001** |
| Item [Paralysis] | 0.093 | 0.007 | 0.081 – 0.107 | -33.264 | **<0.001** | **<0.001** |
| Item [Past life] | 0.047 | 0.004 | 0.041 – 0.055 | -41.089 | **<0.001** | **<0.001** |
| Item [Places (special)] | 0.109 | 0.008 | 0.095 – 0.125 | -31.628 | **<0.001** | **<0.001** |
| Item [Places (animated)] | 0.121 | 0.009 | 0.105 – 0.139 | -29.812 | **<0.001** | **<0.001** |
| Item [Pleasure] | 0.488 | 0.036 | 0.423 – 0.564 | -9.746 | **<0.001** | **<0.001** |
| Item [Presence (non ordinary)] | 0.130 | 0.009 | 0.113 – 0.149 | -28.967 | **<0.001** | **<0.001** |
| Item [Sounds] | 0.303 | 0.021 | 0.264 – 0.348 | -16.917 | **<0.001** | **<0.001** |
| Item [Touch] | 0.154 | 0.011 | 0.134 – 0.176 | -26.879 | **<0.001** | **<0.001** |
| Binary + hedging× Item [Absorbed] | 0.707 | 0.077 | 0.571 – 0.874 | -3.195 | **0.001** | 0.130 |
| Frequency × Item [Absorbed] | 0.789 | 0.093 | 0.625 – 0.994 | -2.010 | **0.044** | 1.000 |
| Binary + hedging× Item [Awe] | 0.879 | 0.093 | 0.715 – 1.080 | -1.225 | 0.220 | 1.000 |
| Frequency × Item [Awe] | 0.618 | 0.068 | 0.497 – 0.768 | -4.345 | **<0.001** | **0.001** |
| Binary + hedging× Item [Déjà vu] | 0.785 | 0.089 | 0.629 – 0.979 | -2.144 | **0.032** | 1.000 |
| Frequency × Item [Déjà vu] | 0.582 | 0.070 | 0.460 – 0.736 | -4.521 | **<0.001** | **0.001** |
| Binary + hedging × Item [Devotion (objects)] | 0.660 | 0.074 | 0.530 – 0.822 | -3.713 | **<0.001** | **0.019** |
| Frequency × Item [Devotion (objects)] | 0.254 | 0.029 | 0.203 – 0.316 | -12.155 | **<0.001** | **<0.001** |
| Binary + hedging × Item [Devotion (people)] | 0.846 | 0.097 | 0.676 – 1.058 | -1.467 | 0.142 | 1.000 |
| Frequency × Item [Devotion (people)] | 0.421 | 0.048 | 0.336 – 0.527 | -7.559 | **<0.001** | **<0.001** |
| Binary + hedging × Item [Diminished Self] | 0.500 | 0.053 | 0.406 – 0.616 | -6.514 | **<0.001** | **<0.001** |
| Frequency × Item [Diminished Self] | 0.275 | 0.031 | 0.221 – 0.341 | -11.620 | **<0.001** | **<0.001** |
| Binary + hedging × Item [ESP (minds)] | 0.833 | 0.087 | 0.678 – 1.023 | -1.745 | 0.081 | 1.000 |
| Frequency × Item [ESP (minds)] | 0.311 | 0.034 | 0.251 – 0.385 | -10.722 | **<0.001** | **<0.001** |
| Binary + hedging × Item [Faces] | 0.897 | 0.094 | 0.731 – 1.102 | -1.034 | 0.301 | 1.000 |
| Frequency × Item [Faces] | 0.527 | 0.057 | 0.426 – 0.651 | -5.906 | **<0.001** | **<0.001** |
| Binary + hedging × Item [Fear] | 1.076 | 0.113 | 0.876 – 1.321 | 0.696 | 0.487 | 1.000 |
| Frequency × Item [Fear] | 1.065 | 0.119 | 0.856 – 1.326 | 0.567 | 0.571 | 1.000 |
| Binary + hedging × Item [Guidance] | 0.738 | 0.078 | 0.599 – 0.908 | -2.868 | **0.004** | 0.384 |
| Frequency × Item [Guidance] | 0.435 | 0.048 | 0.352 – 0.539 | -7.617 | **<0.001** | **<0.001** |
| Binary + hedging × Item [Hopelessness] | 0.592 | 0.062 | 0.482 – 0.727 | -5.011 | **<0.001** | **<0.001** |
| Frequency × Item [Hopelessness] | 0.357 | 0.039 | 0.288 – 0.443 | -9.393 | **<0.001** | **<0.001** |
| Binary + hedging × Item [Joy] | 1.377 | 0.151 | 1.112 – 1.707 | 2.926 | **0.003** | 0.319 |
| Frequency × Item [Joy] | 1.382 | 0.165 | 1.093 – 1.746 | 2.707 | **0.007** | 0.632 |
| Binary + hedging × Item [Light(s)] | 0.886 | 0.099 | 0.712 – 1.102 | -1.088 | 0.277 | 1.000 |
| Frequency × Item [Light(s)] | 0.296 | 0.034 | 0.237 – 0.370 | -10.704 | **<0.001** | **<0.001** |
| Binary + hedging × Item [Loss] | 0.537 | 0.056 | 0.437 – 0.659 | -5.936 | **<0.001** | **<0.001** |
| Frequency × Item [Loss] | 0.420 | 0.046 | 0.338 – 0.521 | -7.859 | **<0.001** | **<0.001** |
| Binary + hedging × Item [Love] | 0.854 | 0.098 | 0.681 – 1.070 | -1.369 | 0.171 | 1.000 |
| Frequency × Item [Love] | 0.680 | 0.084 | 0.534 – 0.866 | -3.127 | **0.002** | 0.164 |
| Binary + hedging × Item [Lucid Dreaming] | 0.590 | 0.066 | 0.475 – 0.733 | -4.752 | **<0.001** | **<0.001** |
| Frequency × Item [Lucid Dreaming] | 0.385 | 0.045 | 0.307 – 0.484 | -8.188 | **<0.001** | **<0.001** |
| Binary + hedging × Item [Meaning in life] | 0.515 | 0.055 | 0.418 – 0.635 | -6.224 | **<0.001** | **<0.001** |
| Frequency × Item [Meaning in life] | 0.227 | 0.025 | 0.183 – 0.282 | -13.555 | **<0.001** | **<0.001** |
| Binary + hedging × Item [Misfortune] | 1.373 | 0.144 | 1.118 – 1.687 | 3.021 | **0.003** | 0.234 |
| Frequency × Item [Misfortune] | 0.691 | 0.076 | 0.558 – 0.856 | -3.381 | **0.001** | 0.067 |
| Binary + hedging × Item [Near Death] | 0.857 | 0.090 | 0.697 – 1.053 | -1.469 | 0.142 | 1.000 |
| Frequency × Item [Near Death] | 0.340 | 0.037 | 0.274 – 0.421 | -9.860 | **<0.001** | **<0.001** |
| Binary + hedging × Item [OBE] | 0.852 | 0.098 | 0.680 – 1.067 | -1.398 | 0.162 | 1.000 |
| Frequency × Item [OBE] | 0.231 | 0.027 | 0.184 – 0.290 | -12.571 | **<0.001** | **<0.001** |
| Binary + hedging × Item [Objects (animated)] | 0.800 | 0.095 | 0.633 – 1.010 | -1.880 | 0.060 | 1.000 |
| Frequency × Item [Objects (animated)] | 0.229 | 0.027 | 0.181 – 0.289 | -12.346 | **<0.001** | **<0.001** |
| Binary + hedging × Item [Pain] | 1.415 | 0.154 | 1.143 – 1.753 | 3.184 | **0.001** | 0.135 |
| Frequency × Item [Pain] | 0.966 | 0.112 | 0.771 – 1.211 | -0.297 | 0.766 | 1.000 |
| Binary + hedging × Item [Paralysis] | 1.105 | 0.117 | 0.899 – 1.359 | 0.948 | 0.343 | 1.000 |
| Frequency × Item [Paralysis] | 0.295 | 0.032 | 0.238 – 0.366 | -11.145 | **<0.001** | **<0.001** |
| Binary + hedging × Item [Past life] | 0.920 | 0.102 | 0.742 – 1.143 | -0.751 | 0.452 | 1.000 |
| Frequency × Item [Past life] | 0.235 | 0.027 | 0.189 – 0.294 | -12.834 | **<0.001** | **<0.001** |
| Binary + hedging × Item [Places (special)] | 0.784 | 0.082 | 0.638 – 0.963 | -2.318 | **0.020** | 1.000 |
| Frequency × Item [Places (special)] | 0.279 | 0.030 | 0.226 – 0.346 | -11.728 | **<0.001** | **<0.001** |
| Binary + hedging × Item [Places (animated)] | 0.744 | 0.079 | 0.605 – 0.915 | -2.799 | **0.005** | 0.477 |
| Frequency × Item [Places (animated)] | 0.343 | 0.037 | 0.277 – 0.425 | -9.801 | **<0.001** | **<0.001** |
| Binary + hedging × Item [Pleasure] | 0.865 | 0.094 | 0.698 – 1.071 | -1.329 | 0.184 | 1.000 |
| Frequency × Item [Pleasure] | 1.187 | 0.143 | 0.938 – 1.503 | 1.425 | 0.154 | 1.000 |
| Binary + hedging × Item [Presence (non ordinary)] | 0.812 | 0.085 | 0.661 – 0.998 | -1.979 | **0.048** | 1.000 |
| Frequency × Item [Presence (non ordinary)] | 0.402 | 0.044 | 0.325 – 0.498 | -8.355 | **<0.001** | **<0.001** |
| Binary + hedging × Item [Sounds] | 1.045 | 0.111 | 0.849 – 1.285 | 0.412 | 0.681 | 1.000 |
| Frequency × Item [Sounds] | 0.316 | 0.035 | 0.255 – 0.392 | -10.501 | **<0.001** | **<0.001** |
| Binary + hedging × Item [Touch] | 0.637 | 0.067 | 0.519 – 0.782 | -4.316 | **<0.001** | **0.001** |
| Frequency × Item [Touch] | 0.187 | 0.020 | 0.151 – 0.231 | -15.440 | **<0.001** | **<0.001** |
| **Random Effects** | | | | | |  |
| σ2 | 3.29 | | | | |  |
| τ00 participant | 1.53 | | | | |  |
| ICC | 0.32 | | | | |  |
| N participant | 7518 | | | | |  |
| Observations | 233151 | | | | |  |
| Marginal R2 / Conditional R2 | 0.255 / 0.492 | | | | |  |

*Note*: Multilevel ordinal regression results examining implied lifetime prevalence rates across different response formats ("Binary only response", "Binary with hedging (Binary + hedging)," and "Frequency scale"). Interactions between response formats and individual non-ordinary experience (INOE) items are included (reference item: "compassion", chosen because it was the most prevalent in the sample). Odds Ratios (OR), standard errors (SE), 95% confidence intervals (CI), z-statistics, and corresponding p-values and p-values with Bonferroni correction are reported. Random intercepts for participants were included. Marginal R² represents variance explained by fixed effects alone; conditional R² represents total variance explained by both fixed and random effects.

# **Table S7**. Means, standard deviations, and correlations with confidence intervals comparing the Binary + Hedging and Frequency scale condition against the Binary response condition.

| Variable | *M* | *SD* | 1 | 2 |
| --- | --- | --- | --- | --- |
|  |  |  |  |  |
| 1. Frequency scale | 0.61 | 0.23 |  |  |
|  |  |  |  |  |
| 2. Binary response | 0.50 | 0.19 | .92** |  |
|  |  |  | [.81, .96] |  |
|  |  |  |  |  |
| 3. Binary + Hedging | 0.51 | 0.19 | .96** | .93** |
|  |  |  | [.90 .98] | [.83, .98] |
|  |  |  |  |  |

*Note.* *M* and *SD* are used to represent mean and standard deviation, respectively. Values in square brackets indicate the 95% confidence interval for each correlation. * Indicates *p* < .05. ** Indicates *p* < .01.

# **Table S8**. Absolute prevalence comparing the Binary + Hedging, Frequency scale and Binary response conditions; Absolute prevalence difference and Rank order for each item.

|  | Absolute prevalence (SD) | | | Absolute prevalence difference | | | | Rank order | | | | |
| --- | --- | --- | --- | --- | --- | --- | --- | --- | --- | --- | --- | --- |
| Item | Binary | Binary + Hedging | Frequency | Binary vs Binary + Hedging | Binary vs  Frequency | Binary + Hedging vs Frequency | Mean Abs Diff (min, max) | Binary | Binary + Hedging | Frequency | Mean rank order (min, max) | SD |
| Compassion | 0.808 (0.394) | 0.83 (0.376) | 0.937 (0.244) | 0.021 | 0.128 | 0.107 | 0.085 (0.021, 0.128) | 1 | 1 | 1 | 1 (1,1) | 0 |
| Absorbed | 0.727 (0.446) | 0.7 (0.458) | 0.881 (0.323) | 0.027 | 0.154 | 0.181 | 0.121 (0.027, 0.181) | 5 | 8 | 6 | 6.3 (5, 8) | 1.53 |
| Awe positive | 0.606 (0.489) | 0.618 (0.486) | 0.776 (0.417) | 0.012 | 0.17 | 0.158 | 0.113 (0.012, 0.17) | 12 | 10 | 10 | 10.6 | 1.15 |
| Déjà vu | 0.783 (0.412) | 0.772 (0.42) | 0.887 (0.317) | 0.011 | 0.104 | 0.115 | 0.077 (0.011, 0.115) | 3 | 3 | 5 | 3.6 (3,5) | 1.15 |
| Devotion objects | 0.266 (0.442) | 0.238 (0.426) | 0.3 (0.458) | 0.028 | 0.034 | 0.062 | 0.042 (0.028, 0.062) | 27 | 28 | 28 | 27.6 (27,28) | 0.58 |
| Devotion people | 0.209 (0.407) | 0.22 (0.415) | 0.321 (0.467) | 0.011 | 0.111 | 0.1 | 0.074 (0.011, 0.111) | 30 | 30 | 26 | 28.6 (26,30) | 2.3 |
| Diminished-self | 0.689 (0.463) | 0.599 (0.49) | 0.723 (0.447) | 0.09 | 0.034 | 0.124 | 0.083 (0.034, 0.124) | 7 | 11 | 12 | 10 (7, 12) | 2.64 |
| ESP (minds) | 0.466 (0.499) | 0.472 (0.499) | 0.538 (0.499) | 0.006 | 0.071 | 0.066 | 0.048 (0.006, 0.071) | 16 | 16 | 19 | 17 (16, 19) | 1.73 |
| Faces | 0.431 (0.495) | 0.449 (0.498) | 0.603 (0.489) | 0.018 | 0.172 | 0.154 | 0.115 (0.018, 0.172) | 20 | 17 | 16 | 17.6 (16, 20) | 2.08 |
| Fear | 0.534 (0.499) | 0.587 (0.492) | 0.799 (0.401) | 0.053 | 0.266 | 0.212 | 0.177 (0.053, 0.266) | 14 | 12 | 9 | 11.6 (9, 14) | 2.5 |
| Guidance | 0.417 (0.493) | 0.4 (0.49) | 0.554 (0.497) | 0.018 | 0.137 | 0.155 | 0.103 (0.018, 0.155) | 21 | 24 | 18 | 21 (18, 24) | 3 |
| Hopelessness | 0.588 (0.492) | 0.526 (0.499) | 0.675 (0.468) | 0.062 | 0.088 | 0.15 | 0.1 (0.062, 0.15) | 13 | 14 | 14 | 13.6 (13, 14) | 0.58 |
| Joy | 0.678 (0.467) | 0.761 (0.426) | 0.903 (0.296) | 0.084 | 0.225 | 0.142 | 0.15 (0.084, 0.225) | 8 | 4 | 3 | 5 (3, 8) | 2.64 |
| Light(s) | 0.245 (0.43) | 0.262 (0.44) | 0.304 (0.46) | 0.017 | 0.058 | 0.041 | 0.039 (0.017, 0.058) | 28 | 27 | 27 | 27.3 (27, 28) | 0.58 |
| Loss | 0.615 (0.487) | 0.532 (0.499) | 0.726 (0.446) | 0.083 | 0.111 | 0.194 | 0.129 (0.083, 0.194) | 10 | 13 | 11 | 11.3 (10, 13) | 1.52 |
| Love | 0.792 (0.406) | 0.795 (0.404) | 0.905 (0.294) | 0.003 | 0.113 | 0.11 | 0.075 (0.003, 0.113) | 2 | 2 | 2 | 2 (2, 2) | 0 |
| Lucid Dreaming | 0.768 (0.422) | 0.713 (0.452) | 0.836 (0.37) | 0.055 | 0.068 | 0.123 | 0.082 (0.055, 0.123) | 4 | 6 | 8 | 6 (4, 8) | 2 |
| Meaning in life | 0.438 (0.496) | 0.352 (0.478) | 0.451 (0.498) | 0.086 | 0.013 | 0.099 | 0.066 (0.013, 0.099) | 18 | 25 | 24 | 22.3 (18, 25) | 3.79 |
| Misfortune | 0.384 (0.486) | 0.483 (0.5) | 0.607 (0.488) | 0.1 | 0.224 | 0.124 | 0.149 (0.1, 0.224) | 25 | 15 | 15 | 18.3 (15, 25) | 5.77 |
| Near Death | 0.399 (0.49) | 0.409 (0.492) | 0.488 (0.5) | 0.011 | 0.09 | 0.079 | 0.06 (0.011, 0.09) | 23 | 22 | 21 | 22 (21, 23) | 1 |
| OBE | 0.215 (0.411) | 0.225 (0.418) | 0.234 (0.424) | 0.01 | 0.019 | 0.009 | 0.013 (0.009, 0.019) | 29 | 29 | 30 | 29.3 (29, 30) | 0.57 |
| Objects (animated) | 0.179 (0.383) | 0.18 (0.384) | 0.195 (0.397) | 0.002 | 0.017 | 0.015 | 0.011 (0.002, 0.017) | 31 | 31 | 31 | 31 (31, 31) | 0 |
| Pain | 0.653 (0.476) | 0.743 (0.437) | 0.86 (0.347) | 0.09 | 0.207 | 0.117 | 0.138 (0.09, 0.207) | 9 | 5 | 7 | 7 (5, 9) | 2 |
| Paralysis | 0.386 (0.487) | 0.444 (0.497) | 0.449 (0.497) | 0.059 | 0.063 | 0.004 | 0.042 (0.004, 0.063) | 24 | 19 | 25 | 22.6 (19, 24) | 3.21 |
| Past life | 0.267 (0.443) | 0.288 (0.453) | 0.29 (0.454) | 0.021 | 0.022 | 0.002 | 0.015 (0.002, 0.022) | 26 | 26 | 29 | 27 (26, 29) | 1.73 |
| Places (special) | 0.414 (0.493) | 0.409 (0.492) | 0.467 (0.499) | 0.006 | 0.053 | 0.058 | 0.039 (0.006, 0.058) | 22 | 23 | 22 | 22.3 (22, 23) | 0.57 |
| Places (animated) | 0.435 (0.496) | 0.418 (0.493) | 0.527 (0.499) | 0.017 | 0.091 | 0.108 | 0.072 (0.017, 0.108) | 19 | 21 | 20 | 20 (19, 21) | 1 |
| Pleasure | 0.701 (0.458) | 0.707 (0.455) | 0.902 (0.298) | 0.006 | 0.201 | 0.195 | 0.134 (0.006, 0.201) | 6 | 7 | 4 | 5.6 (4, 7) | 1.52 |
| Presence (non ordinary) | 0.449 (0.498) | 0.448 (0.497) | 0.57 (0.495) | 0.001 | 0.121 | 0.122 | 0.081 (0.001, 0.122) | 17 | 18 | 17 | 17.3 (17, 18) | 0.57 |
| Sounds | 0.615 (0.487) | 0.657 (0.475) | 0.679 (0.467) | 0.043 | 0.064 | 0.022 | 0.043 (0.022, 0.064) | 11 | 9 | 13 | 11 (9, 13) | 2 |
| Touch | 0.482 (0.5) | 0.433 (0.496) | 0.457 (0.498) | 0.05 | 0.026 | 0.024 | 0.033 (0.024, 0.05) | 15 | 20 | 23 | 19.3 (15, 23) | 4.04 |
| Total (Mean) | - | - | - | 0.035 | 0.105 | 0.102 | 0.08 | - | - | - | 15.97 | 1.74 |

*Note:* This table shows: A) Absolute prevalence of INOE items with mean responses of yes for each Item and Condition and standard deviation (SD) of the yes responses. B) Absolute prevalence differences between the Binary and the other responses conditions (Binary + Hedging and Frequency) and their Mean (min, max). C) Each item’s rank order within each condition (1 = highest prevalence, 31 = lowest prevalence), their mean and standard deviation.

# **Table S9**. Multilevel logistic regression testing the implied lifetime prevalence for Binary (yes vs no), Low frequency (up to 10 times or more) or High frequency (up to 100 times or more) response options.

|  | **Lifetime prevalence** | | | | |
| --- | --- | --- | --- | --- | --- |
| *Predictors* | *Odds Ratios* | *Std. Error* | *CI* | *Statistic* | *p* |
| (Intercept) | 1.110 | 0.220 | 0.753 – 1.637 | 0.528 | 0.598 |
| Low frequency | 1.460 | 0.109 | 1.262 – 1.690 | 5.079 | **<0.001** |
| High frequency | 1.571 | 0.117 | 1.358 – 1.818 | 6.066 | **<0.001** |
| **Random Effects** | | | | | |
| σ2 | 3.29 | | | | |
| τ00 participant | 1.66 | | | | |
| τ00 Item | 1.17 | | | | |
| ICC | 0.46 | | | | |
| N Item | 31 | | | | |
| N participant | 2035 | | | | |
| Observations | 63116 | | | | |
| Marginal R2 / Conditional R2 | 0.007 / 0.466 | | | | |

*Note*: Multilevel logistic regression examining differences in lifetime prevalence ("yes") responses among three response scales: Binary (reference category: yes/no), Low frequency scale ("never" to "more than 10 times"), and High frequency scale ("never" to "more than 100 times"). Odds Ratios (OR), standard errors (SE), 95% confidence intervals (CI), z-statistics, and corresponding p-values are presented. Random intercepts were included for participants and individual experience items. Marginal R² represents variance explained by fixed effects alone; conditional R² represents total variance explained by both fixed and random effects.

#### **Table S10**. Multilevel logistic regression testing interactions between response conditions and baseline prevalence rates on lifetime prevalence.

|  | **Lifetime prevalence** | | | | |  |
| --- | --- | --- | --- | --- | --- | --- |
| *Predictors* | *Odds Ratios* | *std. Error* | *CI* | *Statistic* | *p* | *p (Bonferroni)* |
| (Intercept) | 0.158 | 0.012 | 0.136 – 0.183 | -24.464 | **<0.001** | **<0.001** |
| response condition | 1.468 | 0.072 | 1.333 – 1.617 | 7.788 | **<0.001** | **<0.001** |
| prevalence reescaled | 346.969 | 146.644 | 151.543 – 794.412 | 13.840 | **<0.001** | **<0.001** |
| prevalence reescaled  squared | 0.776 | 0.462 | 0.242 – 2.492 | -0.426 | 0.670 | 1 |
| response condition × prevalence reescaled | 0.677 | 0.156 | 0.432 – 1.063 | -1.695 | 0.090 | 0.45 |
| response condition × prevalence reescaled  squared | 0.892 | 0.292 | 0.470 – 1.694 | -0.349 | 0.727 | 1 |
| **Random Effects** | | | | | |  |
| σ2 | 3.29 | | | | |  |
| τ00 participant | 1.66 | | | | |  |
| τ00 Item | 0.01 | | | | |  |
| ICC | 0.34 | | | | |  |
| N Item | 31 | | | | |  |
| N participant | 2035 | | | | |  |
| Observations | 63116 | | | | |  |
| Marginal R2 / Conditional R2 | 0.194 / 0.465 | | | | |  |

*Note*: Multilevel logistic regression examining how baseline prevalence rates (observed prevalence in the binary only condition, rescaled from lowest to highest) interact with response formats (binary only, low frequency ["never" to ">10 times"], and high frequency ["never" to ">100 times"]) to predict lifetime prevalence ("yes") responses. Both linear and quadratic (squared) effects of baseline prevalence rates are included. Odds Ratios (OR), standard errors (SE), 95% confidence intervals (CI), z-statistics, and corresponding p-values are presented. Random intercepts for participants and items were included. Marginal R² indicates variance explained by fixed effects alone; conditional R² represents total variance explained by both fixed and random effects.

# **Table S11**. Means, standard deviations, and correlations with confidence intervals comparing the low frequency and high frequency condition against the binary response condition.

| Variable | *M* | *SD* | 1 | 2 |
| --- | --- | --- | --- | --- |
|  |  |  |  |  |
| 1.Binary | 0.52 | 0.20 |  |  |
|  |  |  |  |  |
| 2. Low frequency | 0.58 | 0.18 | .95** |  |
|  |  |  | [.89, .97] |  |
|  |  |  |  |  |
| 3. High frequency | 0.59 | 0.17 | .95** | .98** |
|  |  |  | [.86 .97] | [.95, 0.99] |
|  |  |  |  |  |

*Note.* *M* and *SD* are used to represent mean and standard deviation, respectively. Values in square brackets indicate the 95% confidence interval for each correlation. * Indicates *p* < .05. ** Indicates *p* < .01

#

# **Table S12**. Absolute prevalence comparing the low frequency, high frequency and binary conditions; Absolute prevalence difference and Rank order for each item.

|  | Absolute prevalence (SD) | | | Absolute prevalence difference | | | | Rank order | | | | |
| --- | --- | --- | --- | --- | --- | --- | --- | --- | --- | --- | --- | --- |
| Item | Binary | Low freq | High freq | Binary vs Low freq | Binary vs High freq | Low freq vs High freq | Mean Abs Diff (min, max) | Binary | Low freq | High freq | Mean rank order (min, max) | SD |
| Absorbed | 0.787 (0.41) | 0.762 (0.426) | 0.774 (0.419) | 0.025 | 0.013 | 0.012 | 0.017 (0.012, 0.025) | 1 | 4 | 3 | 6 | 2 |
| Awe positive | 0.624 (0.485) | 0.596 (0.491) | 0.6 (0.49) | 0.028 | 0.024 | 0.004 | 0.019 (0.004, 0.028) | 4 | 8 | 6 | 13.3 | 2.8 |
| Compassion | 0.835 (0.371) | 0.796 (0.403) | 0.822 (0.383) | 0.039 | 0.013 | 0.026 | 0.026 (0.013, 0.039) | 10 | 15 | 15 | 2.6 | 1.5 |
| Déjà vu | 0.825 (0.38) | 0.884 (0.321) | 0.878 (0.328) | 0.059 | 0.053 | 0.006 | 0.04 (0.006, 0.059) | 2 | 1 | 1 | 1.3 | 0.57 |
| Devotion (objects) | 0.237 (0.425) | 0.358 (0.48) | 0.392 (0.489) | 0.121 | 0.155 | 0.034 | 0.103 (0.034, 0.155) | 28 | 26 | 26 | 26.6 | 1.15 |
| Devotion (people) | 0.202 (0.402) | 0.272 (0.445) | 0.32 (0.467) | 0.07 | 0.118 | 0.048 | 0.078 (0.048, 0.118) | 29 | 30 | 29 | 29.3 | 0.57 |
| Diminished Self | 0.693 (0.462) | 0.772 (0.42) | 0.754 (0.431) | 0.079 | 0.061 | 0.018 | 0.053 (0.018, 0.079) | 9 | 5 | 8 | 7.6 | 1.52 |
| ESP (minds) | 0.487 (0.5) | 0.632 (0.483) | 0.63 (0.483) | 0.145 | 0.143 | 0.002 | 0.097 (0.002, 0.145) | 15 | 14 | 14 | 14.3 | 0.57 |
| Faces | 0.476 (0.5) | 0.564 (0.496) | 0.576 (0.495) | 0.088 | 0.1 | 0.012 | 0.067 (0.012, 0.1) | 16 | 17 | 17 | 16.6 | 0.57 |
| Fear | 0.597 (0.491) | 0.636 (0.482) | 0.682 (0.466) | 0.039 | 0.085 | 0.046 | 0.056 (0.039, 0.085) | 13 | 13 | 13 | 13 | 0 |
| Guidance | 0.412 (0.492) | 0.504 (0.5) | 0.52 (0.5) | 0.092 | 0.108 | 0.016 | 0.072 (0.016, 0.108) | 22 | 21 | 19 | 20.6 | 1.52 |
| Hopelessness | 0.579 (0.494) | 0.668 (0.471) | 0.688 (0.464) | 0.089 | 0.109 | 0.02 | 0.073 (0.02, 0.109) | 14 | 11 | 11 | 12 | 1.73 |
| Joy | 0.754 (0.431) | 0.772 (0.42) | 0.768 (0.423) | 0.018 | 0.014 | 0.004 | 0.012 (0.004, 0.018) | 5 | 5 | 7 | 5.6 | 1.15 |
| Light(s) | 0.26 (0.439) | 0.314 (0.465) | 0.35 (0.477) | 0.054 | 0.09 | 0.036 | 0.06 (0.036, 0.09) | 26 | 28 | 28 | 27.3 | 1.15 |
| Loss | 0.602 (0.49) | 0.67 (0.471) | 0.684 (0.465) | 0.068 | 0.082 | 0.014 | 0.055 (0.014, 0.082) | 12 | 10 | 12 | 11.3 | 1.15 |
| Love | 0.811 (0.392) | 0.822 (0.383) | 0.798 (0.402) | 0.011 | 0.013 | 0.024 | 0.016 (0.011, 0.024) | 3 | 2 | 4 | 3 | 1 |
| Lucid Dreaming | 0.752 (0.432) | 0.812 (0.391) | 0.824 (0.381) | 0.06 | 0.072 | 0.012 | 0.048 (0.012, 0.072) | 6 | 3 | 2 | 3.6 | 2.08 |
| Meaning in life | 0.382 (0.486) | 0.51 (0.5) | 0.516 (0.5) | 0.128 | 0.134 | 0.006 | 0.09 (0.006, 0.134) | 24 | 19 | 20 | 21 | 2.64 |
| Misfortune | 0.476 (0.5) | 0.506 (0.5) | 0.494 (0.5) | 0.03 | 0.018 | 0.012 | 0.02 (0.012, 0.03) | 16 | 20 | 23 | 19.6 | 3.51 |
| Near Death | 0.375 (0.484) | 0.486 (0.5) | 0.452 (0.498) | 0.111 | 0.077 | 0.034 | 0.074 (0.034, 0.111) | 25 | 25 | 25 | 25 | 0 |
| OBE | 0.201 (0.401) | 0.278 (0.448) | 0.298 (0.458) | 0.077 | 0.097 | 0.02 | 0.064 (0.02, 0.097) | 30 | 29 | 30 | 29.6 | 0.57 |
| Objects (animated) | 0.171 (0.377) | 0.254 (0.436) | 0.296 (0.457) | 0.083 | 0.125 | 0.042 | 0.083 (0.042, 0.125) | 31 | 31 | 31 | 31 | 0 |
| Pain | 0.738 (0.44) | 0.718 (0.45) | 0.714 (0.452) | 0.02 | 0.024 | 0.004 | 0.016 (0.004, 0.024) | 7 | 9 | 9 | 8.3 | 1.15 |
| Paralysis | 0.461 (0.499) | 0.494 (0.5) | 0.488 (0.5) | 0.033 | 0.027 | 0.006 | 0.022 (0.006, 0.033) | 18 | 22 | 24 | 21.3 | 3.05 |
| Past life | 0.246 (0.431) | 0.328 (0.47) | 0.358 (0.48) | 0.082 | 0.112 | 0.03 | 0.075 (0.03, 0.112) | 27 | 27 | 27 | 27 | 0 |
| Places (special) | 0.427 (0.495) | 0.594 (0.492) | 0.584 (0.493) | 0.167 | 0.157 | 0.01 | 0.111 (0.01, 0.167) | 21 | 16 | 16 | 17.3 | 3.2 |
| Places (animated) | 0.432 (0.496) | 0.554 (0.498) | 0.544 (0.499) | 0.122 | 0.112 | 0.01 | 0.082 (0.01, 0.122) | 20 | 18 | 18 | 18.6 | 1.15 |
| Pleasure | 0.723 (0.448) | 0.766 (0.424) | 0.794 (0.405) | 0.043 | 0.071 | 0.028 | 0.048 (0.028, 0.071) | 8 | 7 | 5 | 6.6 | 1.5 |
| Presence (non ordinary) | 0.438 (0.496) | 0.492 (0.5) | 0.5 (0.501) | 0.054 | 0.062 | 0.008 | 0.041 (0.008, 0.062) | 19 | 24 | 22 | 21.6 | 2.5 |
| Sounds | 0.618 (0.486) | 0.666 (0.472) | 0.69 (0.463) | 0.048 | 0.072 | 0.024 | 0.048 (0.024, 0.072) | 11 | 12 | 10 | 11 | 1 |
| Touch | 0.404 (0.491) | 0.494 (0.5) | 0.51 (0.5) | 0.09 | 0.106 | 0.016 | 0.071 (0.016, 0.106) | 23 | 22 | 21 | 22 | 1 |
| Total (Mean) | - | - | - | 0.07 | 0.078 | 0.018 | 0.05 | - | - | - | 15,9 | 1.38 |

Note: This table shows: A) Absolute prevalence of INOE items with mean responses of yes for each Item and Condition and standard deviation (SD) of the yes responses. B) Absolute prevalence differences between the Binary and the other responses conditions (Frequency Low + Frequency High), and their Mean (min, max). C) Each item’s rank order within each condition (1 = highest prevalence, 31 = lowest prevalence), their mean and standard deviation.

# **Figure S13**. Meta-analysis of correlations between validation indicators and lifetime prevalence rates


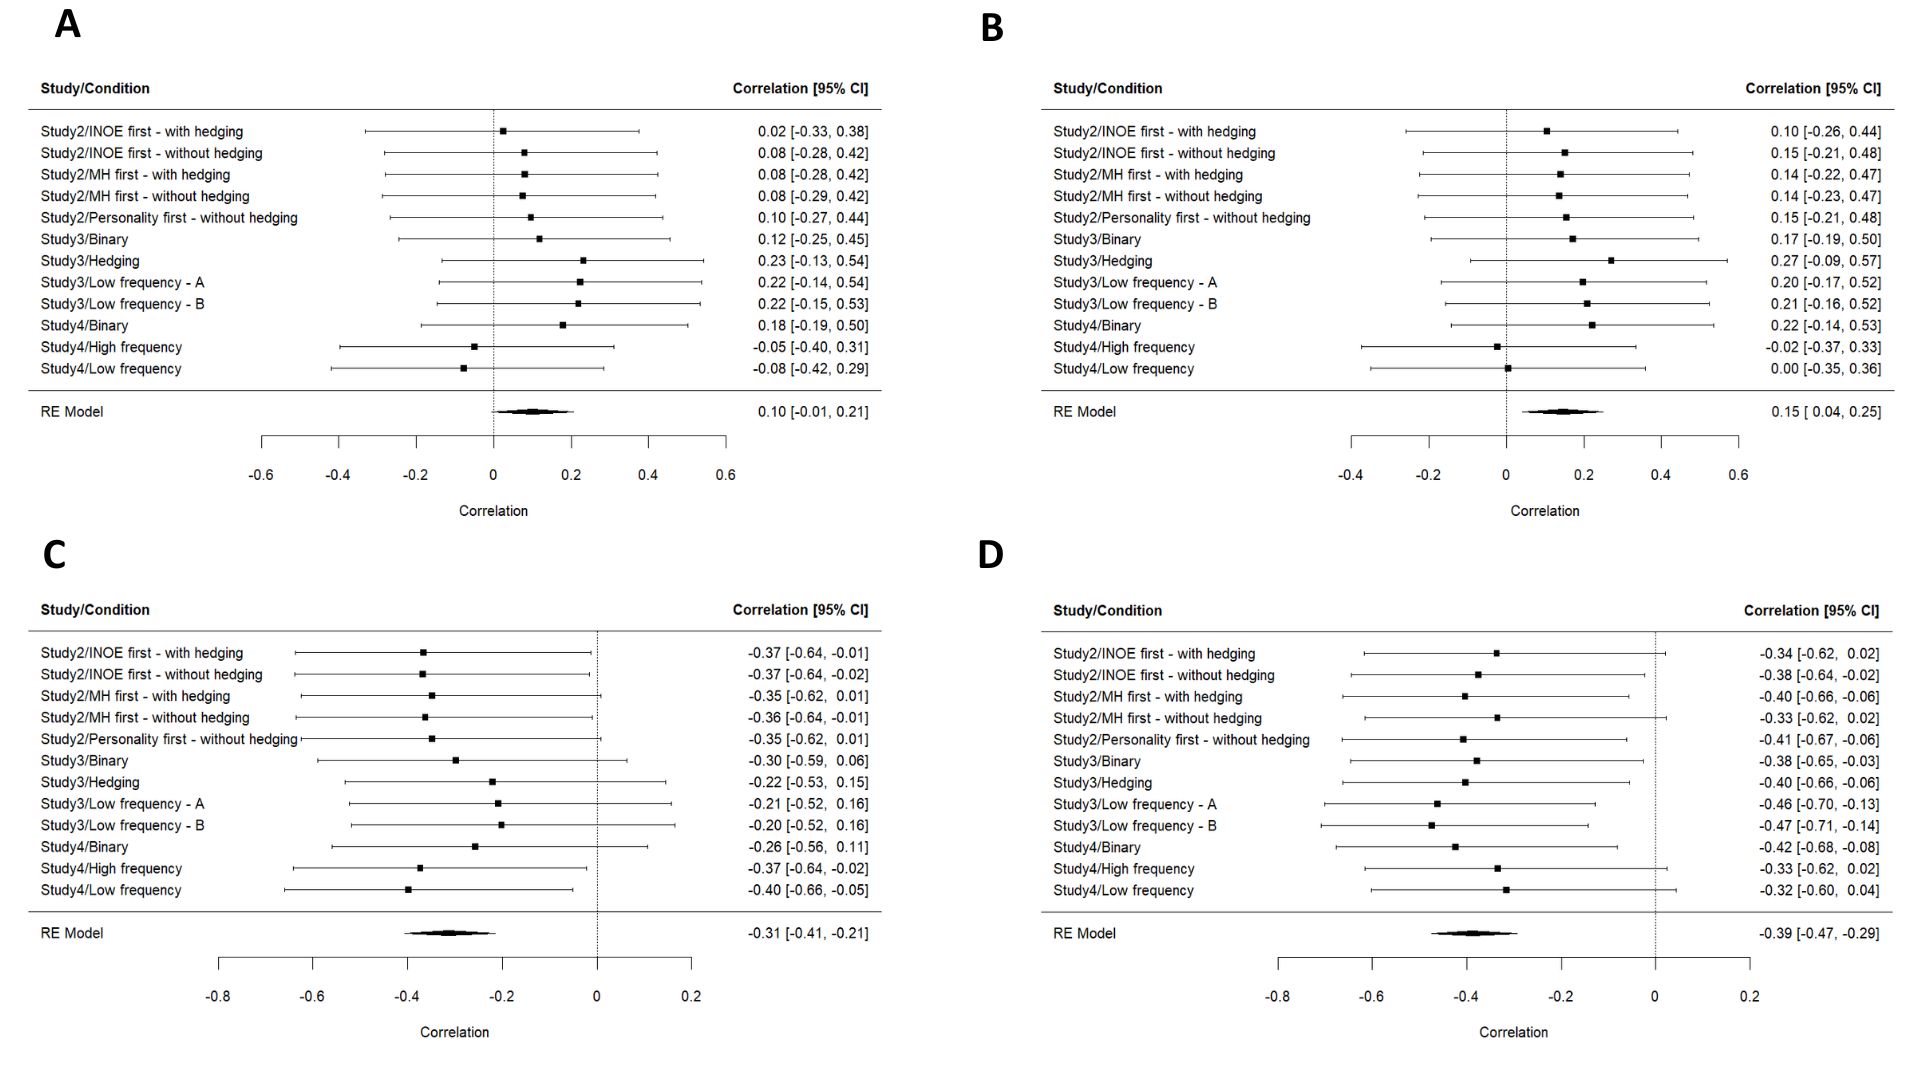


*Note*: Forest plots illustrating random-effects meta-analysis of correlations between validation indicators and lifetime prevalence rates across studies and conditions in the following order from top to bottom: INOE items screening first with binary + hedging response option, INOE items screening first with binary response option, Mental Health (MH) screening first with binary + hedging response option, Mental Health (MH) screening first with binary response option, non-clinical personality screening first with binary responses format, Binary response format (from study 3 data collection), Binary + Hedging response format, INOE items screening first with low frequency scale, followed by INOE items screening first with high frequency scale (from study 3 data collection), Binary response format (from study 4 data collection), and INOE items screening first with high frequency scale, followed by INOE items screening first with low frequency scale (from study 4 data collection). Panels represent validation metrics (A) Validation Score (VS); (B) Positive Proportion Understood (PPU); (C) Negative Proportion Understood (NPU); and (D) Proportion of Ambivalent Answers ["Unsure responses", coded as ‘3’]. Individual correlations with 95% confidence intervals and pooled effect sizes are shown. Correlations were Fisher's z-transformed for analysis and back-transformed for clarity.

# **Table S14A**. Multilevel logistic regression assessing the relative influence of validation indicators and methodological conditions on lifetime prevalence responses. PPU, NPU and Unsure responses validation metrics.

|  | **Lifetime prevalence** | | | | |
| --- | --- | --- | --- | --- | --- |
| *Predictors* | *Odds Ratios* | *std. Error* | *CI* | *Statistic* | *p* |
| (Intercept) | 0.310 | 0.017 | 0.278 – 0.345 | -21.115 | **<0.001** |
| NPU | 0.402 | 0.009 | 0.385 – 0.419 | -42.578 | **<0.001** |
| PPU | 20.399 | 1.062 | 18.419 – 22.591 | 57.897 | **<0.001** |
| Unsure responses | 0.011 | 0.000 | 0.010 – 0.011 | -114.263 | **<0.001** |
| Mental Health first vs Binary only | 0.638 | 0.028 | 0.584 – 0.695 | -10.151 | **<0.001** |
| Personality first vs Binary only | 0.819 | 0.050 | 0.726 – 0.924 | -3.248 | **0.001** |
| Frequency scale vs Binary only | 1.286 | 0.034 | 1.221 – 1.355 | 9.475 | **<0.001** |
| Binary + Hedging vs Binary only | 0.982 | 0.029 | 0.927 – 1.040 | -0.624 | 0.533 |
| **Random Effects** | | | | | |
| σ2 | 3.29 | | | | |
| τ00 participant | 1.24 | | | | |
| ICC | 0.27 | | | | |
| N participant | 11628 | | | | |
| Observations | 349080 | | | | |
| Marginal R2 / Conditional R2 | 0.062 / 0.319 | | | | |

*Note*: Results from a multilevel logistic regression evaluating how validation indicators (Positive Proportion Understood [PPU], Negative Proportion Understood [NPU], and proportion of ambivalent responses ["Unsure responses"]) and methodological conditions (Mental Health first, Personality first, Frequency scale [normative condition], and Binary + Hedging) predict lifetime prevalence ("yes") responses. Odds Ratios (OR), standard errors (SE), 95% confidence intervals (CI), z-statistics, and corresponding p-values are presented. Random intercepts for participants are included. Marginal R² represents variance explained by fixed effects alone; conditional R² represents total variance explained by both fixed and random effects.

# **Table S14B**. Multilevel logistic regression assessing the relative influence of validation indicators and methodological conditions on lifetime prevalence responses. VS and Unsure Responses validation metrics.

|  | **Score** | | | | |
| --- | --- | --- | --- | --- | --- |
| *Predictors* | *Odds Ratios* | *std. Error* | *CI* | *Statistic* | *p* |
| (Intercept) | 0.820 | 0.056 | 0.717 – 0.938 | -2.893 | **0.004** |
| VS | 3.026 | 0.211 | 2.640 – 3.468 | 15.897 | **<0.001** |
| Unsure responses | 0.019 | 0.001 | 0.018 – 0.021 | -98.898 | **<0.001** |
| Mental Health first vs Binary only | 0.648 | 0.028 | 0.595 – 0.705 | -10.082 | **<0.001** |
| Personality first vs Binary only | 0.821 | 0.049 | 0.730 – 0.922 | -3.314 | **0.001** |
| Frequency scale vs Binary only | 1.279 | 0.033 | 1.216 – 1.345 | 9.521 | **<0.001** |
| Binary + Hedging vs Binary only | 0.976 | 0.028 | 0.922 – 1.032 | -0.863 | 0.388 |
| **Random Effects** | | | | | |
| σ2 | 3.29 | | | | |
| τ00 ticket | 1.17 | | | | |
| ICC | 0.26 | | | | |
| N ticket | 11628 | | | | |
| Observations | 360716 | | | | |
| Marginal R2 / Conditional R2 | 0.043 / 0.295 | | | | |

*Note*: Results from a multilevel logistic regression evaluating how validation indicators (Validation Score[VS] and proportion of ambivalent responses ["Unsure responses"]) and methodological conditions (Mental Health first, Personality first, Frequency scale [normative condition], and Hedging) predict lifetime prevalence ("yes") responses. Odds Ratios (OR), standard errors (SE), 95% confidence intervals (CI), z-statistics, and corresponding p-values are presented. Random intercepts for participants are included. The NPU and PPU are not included due to the redundancy with VS. Marginal R² represents variance explained by fixed effects alone; conditional R² represents total variance explained by both fixed and random effects.

# **Table S15.** Prevalence estimates across all studies and conditions (*k* = 12) for each item.

| **Item** | **Group** | **Estimate** | **SE** | **Z** | ***p*** | **-95%CI** | **+95%CI** | **Estimated Prevalence** | **-95%CI** | **+95%CI** | **τ2** | **I2** | **Q** | **H2** |
| --- | --- | --- | --- | --- | --- | --- | --- | --- | --- | --- | --- | --- | --- | --- |
| Deja vu | Abilities | 1.388 | 0.105 | 13.206 | 0.000 | 1.182 | 1.594 | 0.800 | 0.765 | 0.831 | 0.123 | 94.472 | 210.412 | 18.089 |
| Compassion | Emotion | 1.348 | 0.205 | 6.577 | 0.000 | 0.946 | 1.749 | 0.794 | 0.720 | 0.852 | 0.495 | 98.444 | 588.842 | 64.248 |
| Love | Emotion | 1.082 | 0.236 | 4.581 | 0.000 | 0.619 | 1.545 | 0.747 | 0.650 | 0.824 | 0.661 | 98.949 | 972.271 | 95.129 |
| Lucid Dreaming | Abilities | 0.991 | 0.104 | 9.535 | 0.000 | 0.787 | 1.194 | 0.729 | 0.687 | 0.768 | 0.122 | 95.378 | 249.618 | 21.635 |
| Absorbed | Sense of self | 0.985 | 0.157 | 6.275 | 0.000 | 0.677 | 1.292 | 0.728 | 0.663 | 0.785 | 0.288 | 97.921 | 502.299 | 48.105 |
| Joy | Emotion | 0.931 | 0.198 | 4.690 | 0.000 | 0.542 | 1.320 | 0.717 | 0.632 | 0.789 | 0.465 | 98.683 | 753.160 | 75.907 |
| Pleasure | Emotion | 0.885 | 0.198 | 4.479 | 0.000 | 0.498 | 1.273 | 0.708 | 0.622 | 0.781 | 0.461 | 98.705 | 738.729 | 77.229 |
| Diminished Self | Sense of self | 0.584 | 0.079 | 7.369 | 0.000 | 0.429 | 0.739 | 0.642 | 0.606 | 0.677 | 0.069 | 93.370 | 176.457 | 15.082 |
| Pain | Sensory/Body | 0.569 | 0.219 | 2.598 | 0.009 | 0.140 | 0.999 | 0.639 | 0.535 | 0.731 | 0.569 | 99.017 | 1022.673 | 101.687 |
| Sounds (voices) | Sensory/Body | 0.282 | 0.102 | 2.766 | 0.006 | 0.082 | 0.481 | 0.570 | 0.521 | 0.618 | 0.118 | 96.223 | 250.421 | 26.473 |
| Awe | Emotion | 0.243 | 0.174 | 1.400 | 0.162 | -0.097 | 0.584 | 0.561 | 0.476 | 0.642 | 0.356 | 98.641 | 742.586 | 73.575 |
| Loss | Emotion | 0.160 | 0.152 | 1.055 | 0.291 | -0.137 | 0.458 | 0.540 | 0.466 | 0.612 | 0.270 | 98.285 | 591.449 | 58.318 |
| Fear | Emotion | 0.122 | 0.194 | 0.630 | 0.529 | -0.258 | 0.503 | 0.531 | 0.436 | 0.623 | 0.446 | 98.906 | 991.866 | 91.389 |
| Hopelessness | Emotion | 0.079 | 0.115 | 0.687 | 0.492 | -0.146 | 0.304 | 0.520 | 0.464 | 0.575 | 0.151 | 97.092 | 367.158 | 34.388 |
| ESP (minds) | Abilities | -0.096 | 0.054 | -1.768 | 0.077 | -0.203 | 0.010 | 0.476 | 0.449 | 0.503 | 0.029 | 87.103 | 79.807 | 7.754 |
| Faces | Sensory/Body | -0.238 | 0.104 | -2.300 | 0.021 | -0.441 | -0.035 | 0.441 | 0.392 | 0.491 | 0.122 | 96.466 | 349.495 | 28.295 |
| Places (animated) | Presence | -0.267 | 0.084 | -3.187 | 0.001 | -0.431 | -0.103 | 0.434 | 0.394 | 0.474 | 0.078 | 94.589 | 176.219 | 18.481 |
| Presence (non ordinary) | Presence | -0.339 | 0.107 | -3.163 | 0.002 | -0.548 | -0.129 | 0.416 | 0.366 | 0.468 | 0.131 | 96.680 | 319.247 | 30.121 |
| Places (special) (special)* | Emotion | -0.351 | 0.063 | -5.594 | 0.000 | -0.475 | -0.228 | 0.413 | 0.384 | 0.443 | 0.041 | 90.170 | 84.303 | 10.173 |
| Misfortune | Emotion | -0.399 | 0.160 | -2.494 | 0.013 | -0.713 | -0.085 | 0.402 | 0.329 | 0.479 | 0.300 | 98.480 | 628.924 | 65.769 |
| Guidance | Presence | -0.401 | 0.100 | -4.012 | 0.000 | -0.597 | -0.205 | 0.401 | 0.355 | 0.449 | 0.113 | 96.159 | 313.268 | 26.035 |
| Touch | Sensory/Body | -0.435 | 0.081 | -5.346 | 0.000 | -0.594 | -0.275 | 0.393 | 0.356 | 0.432 | 0.073 | 94.164 | 145.464 | 17.135 |
| Meaning in life | Meaning | -0.474 | 0.063 | -7.575 | 0.000 | -0.597 | -0.351 | 0.384 | 0.355 | 0.413 | 0.040 | 89.867 | 111.979 | 9.868 |
| Paralysis | Sensory/Body | -0.484 | 0.078 | -6.220 | 0.000 | -0.637 | -0.332 | 0.381 | 0.346 | 0.418 | 0.066 | 93.549 | 135.457 | 15.502 |
| Near Death | Sickness/ Health | -0.585 | 0.122 | -4.807 | 0.000 | -0.824 | -0.347 | 0.358 | 0.305 | 0.414 | 0.170 | 97.339 | 293.015 | 37.585 |
| Past Life | Abilities | -1.027 | 0.048 | -21.598 | 0.000 | -1.120 | -0.934 | 0.264 | 0.246 | 0.282 | 0.019 | 77.940 | 40.168 | 4.533 |
| Devotion (objects) | Emotion | -1.045 | 0.051 | -20.611 | 0.000 | -1.144 | -0.945 | 0.260 | 0.242 | 0.280 | 0.023 | 80.499 | 54.749 | 5.128 |
| Light(s) | Sensory/Body | -1.165 | 0.081 | -14.466 | 0.000 | -1.323 | -1.007 | 0.238 | 0.210 | 0.268 | 0.069 | 92.282 | 104.496 | 12.956 |
| Devotion (people) | Emotion | -1.236 | 0.090 | -13.733 | 0.000 | -1.413 | -1.060 | 0.225 | 0.196 | 0.257 | 0.088 | 93.572 | 191.450 | 15.557 |
| OBE | Sense of self | -1.319 | 0.062 | -21.306 | 0.000 | -1.440 | -1.198 | 0.211 | 0.192 | 0.232 | 0.037 | 85.141 | 48.055 | 6.730 |
| Objects (animated) | Presence | -1.486 | 0.048 | -31.200 | 0.000 | -1.580 | -1.393 | 0.184 | 0.171 | 0.199 | 0.018 | 71.104 | 30.817 | 3.461 |

*Note*: Estimated prevalence of INOE items derived from a meta-regression analysis conducted across multiple studies. Each item is assigned to a group category (e.g., *Emotion*, *Sensory/Body*, *Abilities*). Prevalence estimates are reported on the logit scale (*Estimate*), along with their standard errors (S), z-statistics (Z), and associated p-values (*p*). Confidence intervals for the logit estimates are shown as -95%CI and +95%CIand corresponding values on the probability scale are presented as E*stimated Prevalence*, with 95% confidence intervals (*-95%CI and +95%CI*). Indices of heterogeneity include the estimated between-study variance (*τ2* ), the proportion of variance due to heterogeneity (*I²*), Cochran’s Q statistic (*Q*), and the ratio of total to within-study variance (*H²*).

# **An exploration of the differences in prevalence rates for specific experiences**

One of the interesting questions is the divergence in prevalence rates across phenomenologically similar experiences within the same broad population. For example, hallucinations were relatively rare in a clinically oriented interview study74 (13.3%), but relatively common in a religiously focused online survey75 (feeling the presence of a dead person: 50.4%; hearing the voice of the dead: 30.8%; seeing the spirit of the dead: 41.3%). Our survey had a few experiences that were broadly aligned with these questions, namely seeing Faces in everyday objects, perceiving Light(s)s without apparent source, hearing voices, feeling physically Touched when nobody is around and perceiving the presence of a force or energy. As an observation, items on visual hallucinations more broadly and perceptions of dead persons could not be validated in the previous study during the validation stage, individuals did not understand the items as intended. Using these experiences for exploratory purposes, what could account for these differences that may vary between 17.5% to 37.1%?

In our data, the difference between the mental health versus nonordinary experience framing suggested that framing may account for about 7% (presence perceptions) to 12% (both Sounds/voices and Touch experiences). When considering at least one nonordinary experience as a benchmark (which often is sometimes as a lower level benchmark in clinical studies, that is at least one hallucinatory experience in one’s lifetime), then 18.8% to 32.3% of the difference may be accountable for by study framing. Using rarer experiences in the religious-oriented study as a criterion (hearing voices of the dead), then the difference between the religious and clinically oriented study is smaller and hence, about 40% to 76% could be accounted for by framing.

When considering the impact of using a binary response scale versus a frequency response scale, across the three conditions we observed an average difference between the binary vs frequency response scales ranging from 6.1% (Sounds/voices) to 12.0% (seeing Faces). When using at least one nonordinary experience as a clinically-relevant benchmark, up to 32.3% of the differences may be explicable by the choice of response scales. When using the rarer experience in the religiously focused study as benchmark, then possibly up to 68.5% of the difference might be due to methodological choices.

**References**

1. Taves, A. *et al.* The Inventory of Nonordinary Experiences (INOE): Evidence of Validity in the United States and India. *PLOS ONE* (2023) doi:http://dx.doi.org/10.1371/journal.pone.0287780.

2. Merckelbach, H., Horselenberg, R. & Muris, P. The Creative Experiences Questionnaire (CEQ): A brief self-report measure of fantasy proneness. *Personal. Individ. Differ.* **31**, 987–995 (2001).

3. Bernstein, E. M. & Putnam, F. W. Development, reliability, and validity of a dissociation scale. *J. Nerv. Ment. Dis.* **174**, 727–735 (1986).

4. Jamieson, G. A. The modified tellegen absorption scale: A clearer window on the structure and meaning of absorption. *Aust. J. Clin. Exp. Hypn.* **33**, 119–139 (2005).

5. Tellegen, A. & Atkinson, G. Openness to absorbing and self-altering experiences (‘absorption’), a trait related to hypnotic susceptibility. *J. Abnorm. Psychol.* **83**, 268–277 (1974).

6. European Social Survey ERIC (ESS ERIC). European Social Survey (ESS), Round 6 - 2012. Preprint at https://doi.org/10.21338/NSD-ESS6-2012 (2013).

7. Agarwal, R. & Karahanna, E. Time Flies When You’re Having Fun: Cognitive Absorption and Beliefs about Information Technology Usage. *MIS Q.* **24**, 665 (2000).

8. Yaden, D. B. *et al.* The development of the Awe Experience Scale (AWE-S): A multifactorial measure for a complex emotion. *J. Posit. Psychol.* **14**, 474–488 (2019).

9. Fredrickson, B. L., Tugade, M. M., Waugh, C. E. & Larkin, G. R. What good are positive emotions in crisis? A prospective study of resilience and emotions following the terrorist attacks on the United States on September 11th, 2001. *J. Pers. Soc. Psychol.* **84**, 365–376 (2003).

10. Galanakis, M., Stalikas, A., Pezirkianidis, C. & Karakasidou, I. Reliability and Validity of the Modified Differential Emotions Scale (mDES) in a Greek Sample. *Psychology* **07**, 101–113 (2016).

11. Shiota, M. N., Keltner, D. & Mossman, A. The nature of awe: Elicitors, appraisals, and effects on self-concept. *Cogn. Emot.* **21**, 944–963 (2007).

12. Studerus, E., Gamma, A. & Vollenweider, F. X. Psychometric Evaluation of the Altered States of Consciousness Rating Scale (OAV). *PLoS ONE* **5**, e12412 (2010).

13. Pommier, E., Neff, K. D. & Tóth-Király, I. The Development and Validation of the Compassion Scale. *Assessment* **27**, 21–39 (2020).

14. Kirby, J. N., Day, J. & Sagar, V. The ‘Flow’ of compassion: A meta-analysis of the fears of compassion scales and psychological functioning. *Clin. Psychol. Rev.* **70**, 26–39 (2019).

15. Gilbert, P. Explorations into the nature and function of compassion. *Curr. Opin. Psychol.* **28**, 108–114 (2019).

16. Gallagher, C., Phd, V. & Pekala, R. The anomalous experiences inventory: Reliability and validity. *J. Parapsychol.* **58**, 402–428 (1994).

17. Fach, W., Atmanspacher, H., Landolt, K., Wyss, T. & Rössler, W. A Comparative Study of Exceptional Experiences of Clients Seeking Advice and of Subjects in an Ordinary Population. *Front. Psychol.* **4**, (2013).

18. Richins, M. L. & Dawson, S. A Consumer Values Orientation for Materialism and Its Measurement: Scale Development and Validation. *J. Consum. Res.* **19**, 303 (1992).

19. Hooley, J. M. & Wilson-Murphy, M. Adult Attachment to Transitional Objects and Borderline Personality Disorder. *J. Personal. Disord.* **26**, 179–191 (2012).

20. Podsakoff, P. M., MacKenzie, S. B., Moorman, R. H. & Fetter, R. Transformational leader behaviors and their effects on followers’ trust in leader, satisfaction, and organizational citizenship behaviors. *Leadersh. Q.* **1**, 107–142 (1990).

21. Attias Basso, A. Politics as Sacralization: Política como sacralización. *Rev. Mex. Cienc. Políticas Soc.* **69**, (2024).

22. Singh, M. The cultural evolution of shamanism. *Behav. Brain Sci.* **41**, e66 (2018).

23. Barrett, F. S., Johnson, M. W. & Griffiths, R. R. Validation of the revised Mystical Experience Questionnaire in experimental sessions with psilocybin. *J. Psychopharmacol. (Oxf.)* **29**, 1182–1190 (2015).

24. MacLean, K. A., Leoutsakos, J. S., Johnson, M. W. & Griffiths, R. R. Factor Analysis of the Mystical Experience Questionnaire: A Study of Experiences Occasioned by the Hallucinogen Psilocybin. *J. Sci. Study Relig.* **51**, 721–737 (2012).

25. Bai, Y. *et al.* Awe, the diminished self, and collective engagement: Universals and cultural variations in the small self. *J. Pers. Soc. Psychol.* **113**, 185–209 (2017).

26. Brett, C. M. C. *et al.* Appraisals of Anomalous Experiences Interview (AANEX): a multidimensional measure of psychological responses to anomalies associated with psychosis. *Br. J. Psychiatry* **191**, s23–s30 (2007).

27. Irwin, H. J., Dagnall, N. & Drinkwater, K. Parapsychological experience as anomalous experience plus paranormal attribution: A questionnaire based on a new approach to measurement. *J. Parapsychol.* **77**, 39–53 (2013).

28. Lange, R. *et al.* Anomalous experiences and paranormal attributions: Psychometric challenges in studying their measurement and relationship. *Psychol. Conscious. Theory Res. Pract.* **6**, 346–358 (2019).

29. Branković, M. Who believes in ESP: Cognitive and motivational determinants of the belief in extra-sensory perception. *Eur. J. Psychol.* **15**, 120–139 (2019).

30. Van Elk, M., Maij, D. & Rutjens, B. Development and Validation of a Porous Theory of Mind Scale. *J. Cogn. Cult.* **20**, 41–65 (2020).

31. Schofield, M. B., Baker, I. S., Staples, P. & Sheffield, D. Belief in the Supernatural Scale. https://doi.org/10.1037/t70743-000 (2019).

32. Russo-Netzer, P. & Icekson, T. An underexplored pathway to life satisfaction: The development and validation of the synchronicity awareness and meaning-detecting scale. *Front. Psychol.* **13**, 1053296 (2023).

33. Aynsworth, C., Collerton, D. & Dudley, R. Measures of visual hallucinations: Review and recommendations. *Clin. Psychol. Rev.* **57**, 164–182 (2017).

34. Mason, O. & Claridge, G. The Oxford-Liverpool Inventory of Feelings and Experiences (O-LIFE): Further description and extended norms. *Schizophr. Res.* **82**, 203–211 (2006).

35. Mitchell, C. A. A. *et al.* The Structure and Measurement of Unusual Sensory Experiences in Different Modalities: The Multi-Modality Unusual Sensory Experiences Questionnaire (MUSEQ). *Front. Psychol.* **8**, 1363 (2017).

36. Maxwell, R. W. & Katyal, S. Characteristics of Kundalini-Related Sensory, Motor, and Affective Experiences During Tantric Yoga Meditation. *Front. Psychol.* **13**, 863091 (2022).

37. Fallio, V. W. *New Developments in Consciousness Research*. (Nova Science Publishers, New York, 2007).

38. Hamilton, M. THE ASSESSMENT OF ANXIETY STATES BY RATING. *Br. J. Med. Psychol.* **32**, 50–55 (1959).

39. Spitzer, R. L., Kroenke, K., Williams, J. B. W. & Löwe, B. A Brief Measure for Assessing Generalized Anxiety Disorder: The GAD-7. *Arch. Intern. Med.* **166**, 1092 (2006).

40. Underwood, L. G. & Teresi, J. A. The daily spiritual experience scale: development, theoretical description, reliability, exploratory factor analysis, and preliminary construct validity using health-related data. *Ann. Behav. Med.* **24**, 22–33 (2002).

41. DeCicco, T. L. & Stroink, M. L. A Third Model of Self-Construal: The Metapersonal Self. *Int. J. Transpers. Stud.*

42. Elnakouri, A., Sharpinskyi, K., McGregor, I. & Scholer, A. Guided by God: Consulting Divine Omniscience During Decision Making. *Int. J. Psychol. Relig.* **34**, 133–153 (2024).

43. Beck, A. T., Weissman, A., Lester, D. & Trexler, L. The measurement of pessimism: The Hopelessness Scale. *J. Consult. Clin. Psychol.* **42**, 861–865 (1974).

44. Fraser, L. *et al.* Identifying hopelessness in population research: a validation study of two brief measures of hopelessness. *BMJ Open* **4**, e005093 (2014).

45. Kroenke, K., Spitzer, R. L. & Williams, J. B. The PHQ-9: validity of a brief depression severity measure. *J. Gen. Intern. Med.* **16**, 606–613 (2001).

46. Hood, R. W. The Construction and Preliminary Validation of a Measure of Reported Mystical Experience. *J. Sci. Study Relig.* **14**, 29 (1975).

47. Greyson, B. The Near-Death Experience Scale: Construction, Reliability, and Validity. *J. Nerv. Ment. Dis.* **171**, 369–375 (1983).

48. Watkins, P. C., Emmons, R. A., Greaves, M. R. & Bell, J. Joy is a distinct positive emotion: Assessment of joy and relationship to gratitude and well-being. *J. Posit. Psychol.* **13**, 522–539 (2018).

49. Lee, S. A. The Persistent Complex Bereavement Inventory: A Measure Based on the *DSM-5*. *Death Stud.* **39**, 399–410 (2015).

50. Lee, S. A. & Neimeyer, R. A. Pandemic Grief Scale: A screening tool for dysfunctional grief due to a COVID-19 loss. *Death Stud.* **46**, 14–24 (2022).

51. Zickfeld, J. H. *et al.* Kama muta: Conceptualizing and measuring the experience often labelled being moved across 19 nations and 15 languages. *Emotion* **19**, 402–424 (2019).

52. Voss, U., Holzmann, R., Tuin, I. & Hobson, A. J. Lucid Dreaming: a State of Consciousness with Features of Both Waking and Non-Lucid Dreaming. *Sleep* **32**, 1191–1200 (2009).

53. Voss, U., Schermelleh-Engel, K., Windt, J., Frenzel, C. & Hobson, A. Measuring consciousness in dreams: The lucidity and consciousness in dreams scale. *Conscious. Cogn.* **22**, 8–21 (2013).

54. Watson, D. Dissociations of the night: Individual differences in sleep-related experiences and their relation to dissociation and schizotypy. *J. Abnorm. Psychol.* **110**, 526–535 (2001).

55. Fassler, O., Knox, J. & Jay Lynn, S. The Iowa Sleep Experiences Survey: Hypnotizability, absorption, and dissociation. *Personal. Individ. Differ.* **41**, 675–684 (2006).

56. Weiss, D. S. The Impact of Event Scale: Revised. in *Cross-Cultural Assessment of Psychological Trauma and PTSD* (eds. Wilson, J. P. & Tang, C. S.) 219–238 (Springer US, Boston, MA, 2007). doi:10.1007/978-0-387-70990-1_10.

57. Boyer, P. Why we blame victims, accuse witches, invent taboos, and invoke spirits: a model of strategic responses to misfortune. *J. R. Anthropol. Inst.* **28**, 1345–1364 (2022).

58. Martial, C. *et al.* The Near-Death Experience Content (NDE-C) scale: Development and psychometric validation. *Conscious. Cogn.* **86**, 103049 (2020).

59. King, R. A. The spontaneous transcendental out-of-body experience: A beneficial absorption response to threat. *J. Mind Behav.* **45**, 49–65 (2024).

60. Sierra, M. & Berrios, G. E. Cambridge Depersonalisation Scale. https://doi.org/10.1037/t38858-000 (2015).

61. Karcioglu, O., Topacoglu, H., Dikme, O. & Dikme, O. A systematic review of the pain scales in adults: Which to use? *Am. J. Emerg. Med.* **36**, 707–714 (2018).

62. Denis, D., French, C. C. & Gregory, A. M. A systematic review of variables associated with sleep paralysis. *Sleep Med. Rev.* **38**, 141–157 (2018).

63. Paradis, C. *et al.* The Assessment of the Phenomenology of Sleep Paralysis: The Unusual Sleep Experiences Questionnaire (USEQ). *CNS Neurosci. Ther.* **15**, 220–226 (2009).

64. Kate, M.-A., Jamieson, G., Dorahy, M. J. & Middleton, W. Measuring Dissociative Symptoms and Experiences in an Australian College Sample Using a Short Version of the Multidimensional Inventory of Dissociation. *J. Trauma Dissociation* **22**, 265–287 (2021).

65. Mazumdar, S. & Mazumdar, S. Religion and place attachment: A study of sacred places. *J. Environ. Psychol.* **24**, 385–397 (2004).

66. Raymond, C. M., Brown, G. & Weber, D. The measurement of place attachment: Personal, community, and environmental connections. *J. Environ. Psychol.* **30**, 422–434 (2010).

67. Waters, F. A. V., Badcock, J. C. & Maybery, M. T. Revision of the factor structure of the Launay–Slade Hallucination Scale (LSHS-R). *Personal. Individ. Differ.* **35**, 1351–1357 (2003).

68. Gard, D. E., Gard, M. G., Kring, A. M. & John, O. P. Anticipatory and consummatory components of the experience of pleasure: A scale development study. *J. Res. Personal.* **40**, 1086–1102 (2006).

69. Llerena, K. *et al.* The Motivation and Pleasure Scale–Self-Report (MAP-SR): Reliability and validity of a self-report measure of negative symptoms. *Compr. Psychiatry* **54**, 568–574 (2013).

70. Steger, M. F., Frazier, P., Oishi, S. & Kaler, M. The meaning in life questionnaire: Assessing the presence of and search for meaning in life. *J. Couns. Psychol.* **53**, 80–93 (2006).

71. Lenzenweger, M. F., Bennett, M. E. & Lilenfeld, L. R. The Referential Thinking Scale as a measure of schizotypy: Scale development and initial construct validation. *Psychol. Assess.* **9**, 452–463 (1997).

72. Peill, J. M. *et al.* Validation of the Psychological Insight Scale: A new scale to assess psychological insight following a psychedelic experience. *J. Psychopharmacol. (Oxf.)* **36**, 31–45 (2022).

73. Braun, V. & Clarke, V. Using thematic analysis in psychology. *Qual. Res. Psychol.* **3**, 77–101 (2006).

74. McGrath, J. J. *et al.* Psychotic Experiences in the General Population: A Cross-National Analysis Based on 31 261 Respondents From 18 Countries. *JAMA Psychiatry* **72**, 697–705 (2015).

75. Monteiro de Barros, M. C. *et al.* Prevalence of spiritual and religious experiences in the general population: A Brazilian nationwide study. *Transcult. Psychiatry* 13634615221088701 (2022) doi:10.1177/13634615221088701.
